# Supplementary material for: QM/MM modeling of the glutathione–hydroxymethyl radical reaction in water
Source: Royal Society of Chemistry journal article supplement (doi:10.1039/b311293d), 2004-01-01
Supplement: b311293d.doc [file b311293d.doc]

Supplementary Material for PCCP

This journal is © The Owner Societies 2004

# QM/MM modeling of the glutathione – hydroxymethyl radical reaction in water

Alexander V. Nemukhin1, Bella L. Grigorenko1, Igor A. Topol2, Stanley K.Burt2

1Department of Chemistry, M.V.Lomonosov Moscow State University, Moscow, 119992, Russian Federation

2Advanced Biomedical Computing Center, National Cancer Institute at Frederick, Frederick, MD, 21702, USA

Parameters of effective fragments given in the content of GAMESS input files

-----------------------------------------------------------------------

Parameters for the effective fragment CONH

$CONH

TITLE

COORDINATES

C 2.1416453591 -0.3350295204 1.3054983014 12.0000000 6.0

O 1.5052612355 -1.2553827682 3.3423016627 15.9949100 8.0

N 0.7078535605 1.3643065741 0.0919918611 14.0030700 7.0

H 1.2670234802 1.9595324657 -1.6302855069 1.0078250 1.0

BO1613 3.3902818055 -0.7277429265 0.6891925164

BO1716 1.8234532973 -0.7952061443 2.3238999820

BO1816 1.4247494598 0.5146385269 0.6987450812

BO1918 0.9874385204 1.6619195199 -0.7691468229

BO2018 -0.6049485318 1.6624391945 0.4140767584

STOP

MONOPOLES

C -4.4964154271 6.00000

O -8.4632517819 8.00000

N -7.3129533443 7.00000

H -0.6810185563 1.00000

BO1613 -0.1238144076 0.00000

BO1716 -0.6682643590 0.00000

BO1816 -0.2992306066 0.00000

BO1918 -0.2967794548 0.00000

BO2018 -0.0210751821 0.00000

STOP

DIPOLES

C -0.5663067565 0.1338048911 0.3605088436

O 0.1479928989 0.2711806950 -0.3384022997

N -0.0302965073 0.0292123472 -0.1687176655

H 0.0319452245 0.0314296728 -0.0919925632

BO1613 0.1776458176 -0.0055209189 -0.0791265126

BO1716 0.0261146845 -0.0271085611 0.0028115600

BO1816 0.0891882194 0.0002605903 -0.1327223427

BO1918 -0.0508326541 -0.0404493049 0.1506487030

BO2018 -0.0531727326 0.0133655826 -0.0609041241

STOP

QUADRUPOLES

C -2.4076947937 -2.1124311561 -2.1942349044 0.0766427137 >

0.1782698883 -0.0724644954

O -4.5831313705 -4.4545361504 -3.9581531093 0.2514742687 >

-0.1301947776 -0.1269870265

N -4.4115313954 -4.9519909331 -4.5283319017 -0.3280471202 >

-0.1755232753 -0.4086704588

H -0.3640760698 -0.3665503288 -0.3557981422 0.0050873535 >

-0.0010340016 -0.0005478265

BO1613 0.1894319334 0.0855266608 0.1378071780 0.0331270019 >

-0.0240946974 -0.0099826515

BO1716 -0.1312616297 -0.3076566687 -0.0987413098 -0.1744082753 >

-0.1715436664 -0.2499535665

BO1816 0.3556966966 0.1300901218 0.2472705599 -0.1780693021 >

-0.0702135805 -0.0794233719

BO1918 -0.1685730153 -0.1740606416 -0.1342680781 0.0010433304 >

-0.0130591531 -0.0148972999

BO2018 0.7402374945 0.7666095103 0.6387346861 0.0520496501 >

0.0099751962 0.0740982515

STOP

OCTUPOLES

C -1.5678480988 0.2636696667 1.0436677673 0.1166160897 >

0.4189032527 -0.4801969129 0.3649047279 -0.5033929442 >

0.1068644215 -0.0384616303

O 0.4789777699 0.8659223299 -0.7063533132 0.2351654432 >

-0.1937028591 0.0784422751 -0.2631254063 0.1464898799 >

0.2510872065 0.0203218051

N -0.0291709347 0.1632924927 -0.4961224012 0.0201381235 >

-0.2095017545 -0.0412994504 -0.1931817676 -0.0564008875 >

-0.0033011105 0.0279708161

H 0.0501903679 0.0225449867 -0.1088665168 0.0042171989 >

-0.0396572657 0.0253254423 -0.0404056520 0.0109219113 >

0.0058657570 0.0014728867

BO1613 0.8326702437 0.0188392853 -0.4075183416 -0.0033240737 >

-0.1161101016 0.2569185348 -0.1737803113 0.2825009853 >

0.0150566973 -0.0171723661

BO1716 0.2215345605 0.0133068951 -0.0469229231 0.0139833771 >

-0.0450719012 0.0249115861 -0.0134181405 0.0160128568 >

-0.0688099107 0.0427725833

BO1816 0.3144769588 0.0020689948 -0.4923414779 -0.0810250116 >

-0.1618562534 0.1596775503 -0.0505088051 0.1462683935 >

0.0232837874 -0.0583607808

BO1918 -0.1707404309 -0.1331693223 0.5142686146 -0.0446043760 >

0.1695684658 -0.0584064775 0.1695478377 -0.0589664987 >

-0.0457762854 0.0012862003

BO2018 -0.1816962374 0.0805373601 -0.1896413323 0.0674586445 >

-0.0173130179 0.0089694883 -0.1170349907 -0.0163992084 >

0.0263539628 0.0032245152

STOP

REPULSIVE POINTS

C 2

-0.00593 0.07057

0.57443 0.25485

O 2

-0.00022 0.01049

1.31537 0.58585

N 2

0.00139 0.04581

3.65630 0.89701

H 2

-0.00019 0.02845

0.08835 0.72923

STOP

$END

-----------------------------------------------------------------------

Parameters for the effective fragment CO2_minus

$CO2minus

TITLE

COORDINATES

C1 6.9875264012 -5.9640697035 2.6832408272 12.0000000 6.0

O2 6.7038785305 -7.1583387333 4.7002209630 15.9949100 8.0

O3 8.8227526915 -4.6348742383 2.0527148542 15.9949100 8.0

BO21 6.8457024659 -6.5612042184 3.6917308951

BO31 7.9051395464 -5.2994719709 2.3679778407

STOP

MONOPOLES

C1 -4.1640461268 6.00000

O2 -8.6143428703 8.00000

O3 -8.5007803340 8.00000

BO21 -0.6860312863 0.00000

BO31 -0.7648166669 0.00000

STOP

DIPOLES

C1 0.6095082169 0.0166410156 0.5146685698

O2 0.2622866377 0.2006054580 -0.2509464108

O3 -0.2237177918 -0.2714633540 0.1103444789

BO21 -0.2068085296 -0.0043571430 -0.0735069681

BO31 -0.1201887330 0.0685881669 -0.1169436940

STOP

QUADRUPOLES

C1 -1.8224977887 -1.7513954811 -1.7404931183 0.0600001646 >

-0.0280969667 -0.0086056685

O2 -4.9659870149 -4.4487770789 -4.2334931555 -0.0851457019 >

-0.1818903581 -0.2152738034

O3 -4.2164541278 -4.2646019224 -4.5761639325 0.2376472134 >

-0.1901182444 -0.0005890192

BO21 -0.3001870709 -0.4766521586 -0.1169070689 0.0456927383 >

0.0773844897 -0.1955317480

BO31 -0.2418226627 -0.4808481248 -0.4777529922 0.2234840715 >

0.0869542323 -0.1053831044

STOP

OCTUPOLES

C1 1.8020226480 0.0350664242 1.4447724448 -0.0271376799 >

0.6726137486 0.5313505123 0.4502211059 0.7083832349 >

0.0698452781 0.0221568086

O2 1.2564665760 0.4477065197 -0.4505309555 0.2627370482 >

-0.0396474654 0.2959618943 -0.1386080536 0.2827110580 >

0.1816592992 0.0237512918

O3 -0.3901745393 -0.6600107594 0.3548040676 -0.2284194053 >

0.0954999934 -0.1163785562 0.0850976995 -0.0756794716 >

-0.2139132771 0.0102435099

BO21 -0.7903537486 0.0185046693 -0.3521087099 0.0210972431 >

-0.1869479025 -0.1949065856 -0.1078879376 -0.2762170386 >

0.0016184432 0.0183114020

BO31 -0.5389694792 0.1610670914 -0.4726943139 0.0446781696 >

-0.2015764838 -0.1193738308 -0.1207684957 -0.2453485325 >

0.0768657900 0.0115372303

STOP

REPULSIVE POINTS

C1 2

0.00739 0.01822

0.18495 0.67126

O2 2

-0.00290 0.02118

1.14501 0.32252

O3 2

-0.00290 0.02118

1.14501 0.32252

STOP

$END

-----------------------------------------------------------------------

Parameters for the effective fragment NH3_plus

$NH3plus

TITLE

COORDINATES

N1 2.5313824469 -6.3643514623 2.5313824469 14.0030700 7.0

H2 0.8625087353 -6.8520141507 1.6250887604 1.0078250 1.0

H3 2.2367174736 -4.7287558254 3.4691400710 1.0078250 1.0

H4 3.1255878864 -7.6392550999 3.8320241524 1.0078250 1.0

BO76 1.6969455911 -6.6081828065 2.0782356036

BO86 2.3840499602 -5.5465536438 3.0002612589

BO96 2.8284851666 -7.0018032811 3.1817032996

STOP

MONOPOLES

N1 -6.9906373111 7.00000

H2 -0.5222937818 1.00000

H3 -0.5990445526 1.00000

H4 -0.6176648615 1.00000

BO76 -0.1198085654 0.00000

BO86 -0.2513068865 0.00000

BO96 -0.2154024147 0.00000

STOP

DIPOLES

N1 0.0746356644 0.0545899688 0.1265878474

H2 -0.1429227984 -0.0243781427 -0.0534868835

H3 -0.0302992311 0.1200718314 0.0440401141

H4 0.0855055965 -0.0735288157 0.0745555325

BO76 0.0316455629 0.0066094850 0.0220221207

BO86 0.0172800894 -0.1110426948 -0.0614880006

BO96 -0.0112486665 0.0956277391 -0.0777071663

STOP

QUADRUPOLES

N1 -4.1390014862 -4.1213909594 -4.1171405713 -0.0660944410 >

-0.0869559244 -0.0256164213

H2 -0.2347224489 -0.2489321199 -0.2313976558 0.0060639254 >

-0.0030816350 0.0050601613

H3 -0.2901492348 -0.2538728737 -0.2925730530 -0.0138912583 >

0.0085093317 0.0014020785

H4 -0.2741621050 -0.3505314377 -0.3144516513 -0.0391194828 >

0.0022728523 0.0048943578

BO76 0.0513599902 0.0433209930 0.0484159960 0.0005410214 >

0.0086070002 -0.0001226728

BO86 -0.1079767790 -0.0751118334 -0.1009828041 -0.0027798385 >

-0.0016393805 0.0162348835

BO96 -0.0618641436 -0.0492560843 -0.0546199411 -0.0082683967 >

0.0081725537 -0.0148432144

STOP

OCTUPOLES

N1 0.2368259141 0.1712847425 0.3758547961 0.0757594212 >

0.1736838843 0.0740539765 0.0711112207 0.0588411486 >

0.0724786454 0.0313253105

H2 -0.2593907906 -0.0587209443 -0.1064779122 -0.0299007045 >

-0.0132556924 -0.0860094974 -0.0228809147 -0.0926070015 >

-0.0239335310 0.0012430606

H3 -0.0723593941 0.2069293551 0.0708685298 0.0611200334 >

0.0220261266 -0.0359170977 0.0192524703 -0.0302132748 >

0.0550773485 0.0118230586

H4 0.2003424534 -0.1635567042 0.1020510769 -0.1391438599 >

0.0304421712 -0.0212650466 0.0362718763 0.0617838542 >

-0.0345580037 0.0100971185

BO76 0.0588432427 -0.0067834828 0.0509331589 -0.0024119002 >

0.0170570236 0.0205784231 0.0193257388 0.0201894290 >

-0.0041608728 -0.0012022309

BO86 0.0474493492 -0.3554449394 -0.1871402223 -0.1181091140 >

-0.0622496467 0.0175917032 -0.0636356706 0.0158646092 >

-0.1193165732 0.0004725485

BO96 -0.0378640021 0.3058722030 -0.2386073313 0.1004574008 >

-0.0787944180 -0.0136904456 -0.0781153759 -0.0150028652 >

0.1022052955 -0.0005012673

STOP

REPULSIVE POINTS

N1 2

0.00139 0.04581

3.65630 0.89701

H2 2

-0.00019 0.02845

0.08835 0.72923

H3 2

-0.00019 0.02845

0.08835 0.72923

H4 2

-0.00019 0.02845

0.08835 0.72923

STOP

$END

-----------------------------------------------------------------------

Parameters for the effective fragment CH2

$CH2

TITLE

COORDINATES

C1 4.6142006360 -3.8529623164 -0.9847929040 12.0000000 6.0

H2 2.9912850605 -4.0794648733 -2.2225823232 1.0078250 1.0

H3 6.2396484443 -4.0296705935 -2.2390796311 1.0078250 1.0

BO104 4.6864826550 -4.9714249881 -0.0417345984

BO1110 3.8027428482 -3.9662135948 -1.6036876136

BO1210 5.4269245402 -3.9413164549 -1.6119362675

STOP

MONOPOLES

C1 -5.6832489973 6.00000

H2 -0.7799289197 1.00000

H3 -0.7890362677 1.00000

BO104 -0.0031163802 0.00000

BO1110 -0.3480734346 0.00000

BO1210 -0.3542435149 0.00000

STOP

DIPOLES

C1 0.0989319562 0.0417391988 0.0296117642

H2 -0.0841692077 -0.0349503009 -0.0573751665

H3 0.0565435128 -0.0082733227 -0.0410328940

BO104 0.1496813809 -0.0562771613 -0.0606753455

BO1110 0.1984620843 0.0051756045 0.1151486635

BO1210 -0.2376639362 0.0109423386 0.1157130695

STOP

QUADRUPOLES

-3.8890712289 -3.6210055795 -3.8145831046 0.0277688493 >

0.0049029316 0.0496917074

H2 -0.4525215653 -0.4732314571 -0.4950673575 0.0239388791 >

0.0046388451 0.0051241147

H3 -0.5005516777 -0.5005269341 -0.5003983452 0.0001948087 >

-0.0004149944 -0.0010477191

BO104 0.4069321909 0.3937704560 0.4691014648 -0.0020675100 >

0.1307184143 -0.0318521149

BO1110 -0.2774632015 -0.2831367534 -0.2838076251 -0.0004091330 >

0.0045426592 -0.0008812322

BO1210 -0.2618182358 -0.2864325611 -0.2734837076 0.0034883537 >

0.0110572137 0.0020738036

STOP

OCTUPOLES

C1 0.4058915869 0.0790608545 0.1840282255 0.0735593310 >

0.2089909409 0.1470924536 -0.0622134057 0.1363007081 >

0.0989491025 0.0027808234

H2 -0.2083884576 -0.0969359699 -0.0972864492 -0.0624343270 >

-0.0325168699 -0.0800092909 -0.0393394380 -0.0531823288 >

-0.0243704400 -0.0085379311

H3 0.0721327432 -0.0114431770 -0.0524808853 -0.0035969281 >

-0.0139268426 0.0253790735 -0.0183510077 0.0233607329 >

-0.0043225385 -0.0003753035

BO104 0.7431731722 -0.2914693089 -0.2665168756 -0.0737606934 >

-0.0771819377 0.2452059549 -0.1227303656 0.2823471516 >

-0.1032424726 0.0396395588

BO1110 0.7373865138 -0.0036896556 0.4040662044 -0.0009522162 >

0.1344063469 0.2440743983 0.1343195259 0.2461244533 >

-0.0012310317 0.0007212853

BO1210 -0.9225964514 0.0304222926 0.3972962082 0.0084617089 >

0.1222038278 -0.3009287766 0.1345431410 -0.3115739200 >

0.0087673338 -0.0020630897

STOP

REPULSIVE POINTS

C1 2

-0.01654 0.01051

0.09803 0.15267

H2 2

0.00686 0.01000

0.00181 0.03286

H3 2

0.00686 0.01000

0.00181 0.03286

STOP

$END

-----------------------------------------------------------------------

Parameters for the effective fragment CH

$CH

TITLE

COORDINATES

C1 4.7587646741 -6.0898876598 0.9013237071 12.0000000 6.0

H2 4.9388555607 -7.8400384861 -0.1701887225 1.0078250 1.0

N3 2.5313824469 -6.3643514623 2.5313824469

BO41 5.8731455377 -6.0269786817 1.7922822672

BO54 4.8488101174 -6.9649630729 0.3655674923

BO64 3.6450735605 -6.2271195610 1.7163530770

STOP

MONOPOLES

C1 -5.7466073249 6.00000

H2 -0.7880654293 1.00000

BO41 -0.0995670502 0.00000

BO54 -0.3814390611 0.00000

BO64 0.0660951594 0.00000

STOP

REPULSIVE POINTS

C1 2

-0.00148 0.01149

0.58515 0.30126

H2 2

0.00066 0.01058

0.01062 0.32025

STOP

$END

The coordinates of optimized geometry configurations for the critical points on potential energy surfaces in the pdb-format

-----------------------------------------------------------------------

REMARK CH2OH+CH3SH and 39 water molecules

REMARK Equilibrium configuration of the reagents

REMARK QM(RHF/6-31G**)/MM(OPLSAA;TIP3P)

REMARK Energy -552.72645 au

ATOM 1 H Q 0.770 0.229 4.686

ATOM 2 C Q -0.022 0.726 4.152

ATOM 3 H Q -0.926 0.674 4.737

ATOM 4 H Q -0.186 0.245 3.199

ATOM 5 SH Q 0.353 2.489 3.928

ATOM 6 HS Q 1.554 2.363 3.383

ATOM 7 C Q 1.287 2.406 0.076

ATOM 8 H Q 1.843 2.821 0.892

ATOM 9 H Q 0.232 2.577 0.011

ATOM 10 O Q 1.912 2.342 -1.144

ATOM 11 H Q 2.838 2.162 -1.019

ATOM 12 O1 M -1.042 -3.917 4.470

ATOM 13 H2 M -1.799 -3.557 4.904

ATOM 14 H3 M -1.113 -3.682 3.559

ATOM 15 O2 M -3.524 2.887 3.150

ATOM 16 H2 M -3.353 2.689 2.243

ATOM 17 H3 M -3.078 3.697 3.339

ATOM 18 O3 M -4.407 -0.963 3.908

ATOM 19 H2 M -5.019 -0.263 3.743

ATOM 20 H3 M -4.274 -1.406 3.085

ATOM 21 O4 M -5.800 1.358 3.430

ATOM 22 H2 M -5.069 1.945 3.322

ATOM 23 H3 M -6.477 1.845 3.871

ATOM 24 O5 M -3.245 2.634 0.412

ATOM 25 H2 M -4.095 2.810 0.041

ATOM 26 H3 M -2.618 3.112 -0.106

ATOM 27 O6 M -1.530 1.192 -2.132

ATOM 28 H2 M -2.121 0.649 -1.635

ATOM 29 H3 M -0.757 0.674 -2.293

ATOM 30 O7 M -2.141 5.324 3.048

ATOM 31 H2 M -1.243 5.530 3.253

ATOM 32 H3 M -2.273 5.558 2.144

ATOM 33 O8 M 2.507 -0.607 1.784

ATOM 34 H2 M 2.563 -1.087 2.595

ATOM 35 H3 M 2.977 0.200 1.914

ATOM 36 O9 M -4.061 -2.021 1.366

ATOM 37 H2 M -3.667 -1.314 0.881

ATOM 38 H3 M -4.676 -2.439 0.785

ATOM 39 O1 M -1.461 -2.886 1.984

ATOM 40 H2 M -2.365 -2.685 1.799

ATOM 41 H3 M -0.941 -2.281 1.480

ATOM 42 O1 M 1.241 -3.419 5.776

ATOM 43 H2 M 0.496 -3.648 5.244

ATOM 44 H3 M 1.520 -4.210 6.207

ATOM 45 O1 M 2.656 1.073 6.881

ATOM 46 H2 M 3.075 0.231 6.962

ATOM 47 H3 M 1.771 0.966 7.192

ATOM 48 O1 M 4.324 1.993 4.896

ATOM 49 H2 M 4.504 2.901 5.082

ATOM 50 H3 M 3.631 1.729 5.479

ATOM 51 O1 M -0.653 -1.621 6.918

ATOM 52 H2 M 0.027 -2.182 6.582

ATOM 53 H3 M -1.459 -1.903 6.517

ATOM 54 O1 M -2.165 5.930 0.303

ATOM 55 H2 M -1.956 5.233 -0.297

ATOM 56 H3 M -2.724 6.531 -0.162

ATOM 57 O1 M -2.643 -0.052 0.178

ATOM 58 H2 M -2.790 0.849 0.414

ATOM 59 H3 M -1.755 -0.256 0.424

ATOM 60 O1 M -0.036 -0.896 0.590

ATOM 61 H2 M 0.208 -0.737 -0.307

ATOM 62 H3 M 0.744 -0.786 1.108

ATOM 63 O1 M -3.274 1.190 5.382

ATOM 64 H2 M -3.325 1.823 4.684

ATOM 65 H3 M -3.609 0.378 5.037

ATOM 66 O1 M -1.954 2.680 7.275

ATOM 67 H2 M -2.111 3.506 6.847

ATOM 68 H3 M -2.467 2.035 6.815

ATOM 69 O1 M 0.125 0.841 7.772

ATOM 70 H2 M -0.200 -0.023 7.581

ATOM 71 H3 M -0.591 1.438 7.630

ATOM 72 O1 M -3.061 -2.494 5.744

ATOM 73 H2 M -3.702 -2.679 6.411

ATOM 74 H3 M -3.493 -1.967 5.091

ATOM 75 O1 M 3.183 -1.442 -0.720

ATOM 76 H2 M 3.561 -2.307 -0.702

ATOM 77 H3 M 2.905 -1.249 0.160

ATOM 78 O1 M 2.818 -1.752 4.218

ATOM 79 H2 M 3.521 -1.461 4.777

ATOM 80 H3 M 2.274 -2.321 4.739

ATOM 81 O1 M 4.137 1.685 2.153

ATOM 82 H2 M 4.187 2.579 1.855

ATOM 83 H3 M 4.272 1.702 3.087

ATOM 84 O1 M 2.861 5.026 3.385

ATOM 85 H2 M 3.401 4.904 4.151

ATOM 86 H3 M 3.406 4.841 2.637

ATOM 87 O1 M 4.421 1.111 -0.581

ATOM 88 H2 M 4.530 1.176 0.353

ATOM 89 H3 M 4.158 0.223 -0.762

ATOM 90 O1 M 0.910 -0.255 -1.961

ATOM 91 H2 M 1.632 -0.856 -1.874

ATOM 92 H3 M 1.273 0.614 -1.901

ATOM 93 O1 M 4.264 4.281 1.086

ATOM 94 H2 M 3.606 4.749 0.596

ATOM 95 H3 M 5.081 4.406 0.631

ATOM 96 O1 M -2.234 4.994 5.841

ATOM 97 H2 M -1.361 5.318 5.997

ATOM 98 H3 M -2.428 5.165 4.933

ATOM 99 O1 M -1.593 3.874 -1.483

ATOM 100 H2 M -1.638 3.001 -1.839

ATOM 101 H3 M -0.809 4.269 -1.831

ATOM 102 O1 M -0.061 4.006 8.838

ATOM 103 H2 M -0.252 3.819 9.743

ATOM 104 H3 M -0.696 3.534 8.323

ATOM 105 O1 M 0.426 6.191 3.709

ATOM 106 H2 M 0.358 6.249 4.649

ATOM 107 H3 M 1.257 5.784 3.522

ATOM 108 O1 M 4.279 4.641 5.745

ATOM 109 H2 M 4.806 5.301 6.166

ATOM 110 H3 M 3.588 4.420 6.349

ATOM 111 O1 M 2.298 3.774 7.400

ATOM 112 H2 M 1.586 3.855 8.013

ATOM 113 H3 M 2.419 2.851 7.243

ATOM 114 O1 M 0.379 5.701 6.451

ATOM 115 H2 M 1.001 4.996 6.372

ATOM 116 H3 M 0.188 5.793 7.371

ATOM 117 O1 M 4.843 -0.631 5.732

ATOM 118 H2 M 5.735 -0.829 5.968

ATOM 119 H3 M 4.845 0.241 5.374

ATOM 120 O1 M 0.874 4.620 -2.549

ATOM 121 H2 M 1.298 3.805 -2.330

ATOM 122 H3 M 1.145 4.839 -3.426

ATOM 123 O1 M 0.370 6.890 1.032

ATOM 124 H2 M -0.507 6.642 0.789

ATOM 125 H3 M 0.418 6.830 1.973

ATOM 126 O1 M 2.386 5.646 -0.336

ATOM 127 H2 M 1.822 6.194 0.185

ATOM 128 H3 M 1.881 5.371 -1.084

TER

-----------------------------------------------------------------------

REMARK CH2OH+CH3SH and 53 water molecules

REMARK Configuration of the barrier

REMARK QM(RHF/6-31G**)/MM(OPLSAA;TIP3P)

REMARK Energy -552.92755 au

ATOM 1 H Q 1.109 0.141 4.094

ATOM 2 C Q 0.210 0.679 4.352

ATOM 3 H Q -0.122 0.383 5.336

ATOM 4 H Q -0.569 0.457 3.640

ATOM 5 SH Q 0.532 2.468 4.399

ATOM 6 HS Q 0.693 2.683 2.889

ATOM 7 C Q 0.846 2.885 1.458

ATOM 8 H Q 1.174 3.913 1.440

ATOM 9 H Q -0.180 2.730 1.173

ATOM 10 O Q 1.679 1.978 0.900

ATOM 11 H Q 2.572 2.305 0.883

ATOM 12 O1 M -0.623 -2.918 3.406

ATOM 13 H2 M -1.299 -2.667 4.015

ATOM 14 H3 M -1.059 -3.204 2.619

ATOM 15 O1 M -3.081 2.803 2.839

ATOM 16 H2 M -3.142 2.608 1.918

ATOM 17 H3 M -2.368 3.412 2.942

ATOM 18 O1 M -4.559 -0.891 3.596

ATOM 19 H2 M -5.069 -0.116 3.419

ATOM 20 H3 M -4.660 -1.457 2.848

ATOM 21 O1 M -5.606 1.607 3.090

ATOM 22 H2 M -4.778 2.059 3.050

ATOM 23 H3 M -6.246 2.239 3.378

ATOM 24 O1 M -3.572 2.472 0.144

ATOM 25 H2 M -4.444 2.793 -0.025

ATOM 26 H3 M -3.039 2.739 -0.587

ATOM 27 O1 M 0.206 1.709 -1.764

ATOM 28 H2 M 0.243 0.868 -2.191

ATOM 29 H3 M 0.674 1.621 -0.950

ATOM 30 O1 M -1.356 4.928 2.653

ATOM 31 H2 M -0.668 5.422 3.069

ATOM 32 H3 M -1.387 5.209 1.753

ATOM 33 O1 M 3.602 -1.025 2.735

ATOM 34 H2 M 3.523 -1.376 3.608

ATOM 35 H3 M 3.990 -0.169 2.821

ATOM 36 O1 M -4.833 -2.290 1.218

ATOM 37 H2 M -4.454 -1.565 0.746

ATOM 38 H3 M -5.587 -2.571 0.724

ATOM 39 O1 M -2.177 -3.241 1.207

ATOM 40 H2 M -3.108 -3.096 1.258

ATOM 41 H3 M -1.842 -2.628 0.572

ATOM 42 O1 M 0.939 -3.416 5.618

ATOM 43 H2 M 0.510 -3.286 4.788

ATOM 44 H3 M 1.117 -4.340 5.689

ATOM 45 O1 M 1.645 1.463 8.445

ATOM 46 H2 M 2.126 0.933 7.830

ATOM 47 H3 M 0.846 1.000 8.637

ATOM 48 O1 M 3.755 2.863 5.223

ATOM 49 H2 M 3.865 3.370 6.012

ATOM 50 H3 M 2.825 2.789 5.076

ATOM 51 O1 M -0.846 -1.740 6.951

ATOM 52 H2 M -0.147 -2.302 6.657

ATOM 53 H3 M -1.567 -1.870 6.356

ATOM 54 O1 M -1.728 5.303 -0.073

ATOM 55 H2 M -1.891 4.677 -0.760

ATOM 56 H3 M -2.550 5.734 0.101

ATOM 57 O1 M -3.516 -0.298 0.008

ATOM 58 H2 M -3.539 0.640 0.107

ATOM 59 H3 M -2.611 -0.535 -0.122

ATOM 60 O1 M -0.927 -1.171 -0.241

ATOM 61 H2 M -0.511 -1.129 -1.087

ATOM 62 H3 M -0.235 -1.208 0.399

ATOM 63 O1 M -3.223 1.058 5.119

ATOM 64 H2 M -3.035 1.679 4.433

ATOM 65 H3 M -3.675 0.336 4.714

ATOM 66 O1 M -2.403 2.154 7.480

ATOM 67 H2 M -2.166 2.959 7.047

ATOM 68 H3 M -2.805 1.603 6.827

ATOM 69 O1 M -0.815 0.287 8.754

ATOM 70 H2 M -0.843 -0.496 8.229

ATOM 71 H3 M -1.404 0.904 8.350

ATOM 72 O1 M -2.795 -2.408 5.068

ATOM 73 H2 M -3.352 -3.064 5.454

ATOM 74 H3 M -3.358 -1.822 4.587

ATOM 75 O1 M 4.860 -2.124 0.601

ATOM 76 H2 M 5.299 -2.936 0.794

ATOM 77 H3 M 4.429 -1.853 1.396

ATOM 78 O1 M 3.197 -1.807 5.257

ATOM 79 H2 M 3.376 -1.142 5.902

ATOM 80 H3 M 2.470 -2.314 5.584

ATOM 81 O1 M 4.768 1.446 3.005

ATOM 82 H2 M 4.680 2.120 2.350

ATOM 83 H3 M 4.588 1.852 3.838

ATOM 84 O1 M 3.338 5.501 3.844

ATOM 85 H2 M 3.719 4.669 4.078

ATOM 86 H3 M 3.777 5.788 3.059

ATOM 87 O1 M 5.783 0.521 0.393

ATOM 88 H2 M 5.802 0.766 1.304

ATOM 89 H3 M 5.639 -0.411 0.366

ATOM 90 O1 M 2.656 -1.030 -0.703

ATOM 91 H2 M 3.466 -1.466 -0.494

ATOM 92 H3 M 2.109 -1.092 0.063

ATOM 93 O1 M 4.286 3.361 1.145

ATOM 94 H2 M 4.214 4.270 1.388

ATOM 95 H3 M 4.726 3.337 0.310

ATOM 96 O1 M -1.978 4.305 5.846

ATOM 97 H2 M -1.842 5.239 5.834

ATOM 98 H3 M -1.317 3.928 5.287

ATOM 99 O1 M -2.019 3.287 -1.967

ATOM 100 H2 M -1.249 2.747 -1.886

ATOM 101 H3 M -2.123 3.475 -2.886

ATOM 102 O1 M -1.435 3.625 9.698

ATOM 103 H2 M -1.312 3.040 10.429

ATOM 104 H3 M -1.941 3.153 9.056

ATOM 105 O1 M 0.707 6.261 3.960

ATOM 106 H2 M 0.623 6.171 4.895

ATOM 107 H3 M 1.600 6.043 3.745

ATOM 108 O1 M 3.591 4.409 7.529

ATOM 109 H2 M 3.747 5.303 7.272

ATOM 110 H3 M 2.726 4.382 7.906

ATOM 111 O1 M 0.938 4.104 8.405

ATOM 112 H2 M 0.162 4.150 8.941

ATOM 113 H3 M 1.198 3.197 8.382

ATOM 114 O1 M 0.555 6.216 6.678

ATOM 115 H2 M 0.651 5.504 7.289

ATOM 116 H3 M -0.308 6.573 6.811

ATOM 117 O1 M 3.705 0.443 6.766

ATOM 118 H2 M 4.190 0.718 7.527

ATOM 119 H3 M 3.818 1.117 6.114

ATOM 120 O1 M 2.308 3.578 -2.105

ATOM 121 H2 M 1.481 3.135 -2.206

ATOM 122 H3 M 2.950 2.914 -1.914

ATOM 123 O1 M 0.395 7.027 -0.119

ATOM 124 H2 M -0.256 6.351 -0.213

ATOM 125 H3 M -0.035 7.767 0.276

ATOM 126 O1 M 2.800 5.939 -0.817

ATOM 127 H2 M 2.023 6.440 -0.624

ATOM 128 H3 M 2.524 5.198 -1.333

ATOM 129 O1 M 5.217 4.509 -1.245

ATOM 130 H2 M 5.241 4.088 -2.089

ATOM 131 H3 M 4.482 5.102 -1.259

ATOM 132 O1 M 4.389 6.113 1.410

ATOM 133 H2 M 3.800 6.206 0.679

ATOM 134 H3 M 5.237 6.404 1.115

ATOM 135 O1 M 1.119 -1.534 1.609

ATOM 136 H2 M 0.609 -2.022 2.235

ATOM 137 H3 M 1.925 -1.298 2.041

ATOM 138 O1 M -1.708 8.309 1.258

ATOM 139 H2 M -1.569 8.437 2.182

ATOM 140 H3 M -2.490 7.787 1.171

ATOM 141 O1 M -0.843 8.512 3.895

ATOM 142 H2 M -0.253 7.778 3.823

ATOM 143 H3 M -0.306 9.284 3.979

ATOM 144 O1 M 3.247 6.855 6.293

ATOM 145 H2 M 2.322 6.842 6.478

ATOM 146 H3 M 3.351 6.557 5.403

ATOM 147 O1 M -3.971 6.597 0.961

ATOM 148 H2 M -4.742 7.074 0.698

ATOM 149 H3 M -4.207 6.104 1.731

ATOM 150 O1 M -4.617 5.070 5.880

ATOM 151 H2 M -5.042 4.823 6.686

ATOM 152 H3 M -3.750 4.697 5.905

ATOM 153 O1 M 0.653 -0.908 -2.534

ATOM 154 H2 M 0.783 -1.412 -3.321

ATOM 155 H3 M 1.438 -1.002 -2.019

ATOM 156 O1 M -2.057 7.053 5.918

ATOM 157 H2 M -2.990 7.172 6.003

ATOM 158 H3 M -1.769 7.642 5.239

ATOM 159 O1 M 3.848 1.443 -1.333

ATOM 160 H2 M 3.342 0.654 -1.223

ATOM 161 H3 M 4.674 1.298 -0.901

ATOM 162 O1 M -4.704 5.091 3.117

ATOM 163 H2 M -4.106 4.363 3.062

ATOM 164 H3 M -4.844 5.259 4.035

ATOM 165 O1 M -0.976 1.395 11.270

ATOM 166 H2 M -0.643 0.834 11.952

ATOM 167 H3 M -0.903 0.912 10.462

ATOM 168 O1 M 4.410 2.084 8.892

ATOM 169 H2 M 4.432 2.956 8.534

ATOM 170 H3 M 3.530 1.941 9.204

TER

-----------------------------------------------------------------------

REMARK CH2OH+CH3SH and 39 water molecules

REMARK Equilibrium configuration of the products

REMARK QM(RHF/6-31G**)/MM(OPLSAA;TIP3P)

REMARK Energy -552.74555 au

ATOM 1 H Q 1.127 -0.150 3.663

ATOM 2 C Q 0.398 0.450 4.187

ATOM 3 H Q 0.146 -0.036 5.119

ATOM 4 H Q -0.508 0.570 3.614

ATOM 5 SH Q 1.091 2.062 4.602

ATOM 6 HS Q 0.404 3.557 2.121

ATOM 7 C Q 0.345 2.972 1.214

ATOM 8 H Q 0.430 3.631 0.361

ATOM 9 H Q -0.618 2.481 1.189

ATOM 10 O Q 1.332 1.965 1.187

ATOM 11 H Q 2.179 2.361 1.335

ATOM 12 O1 M -1.153 -3.809 4.285

ATOM 13 H2 M -1.878 -3.437 4.762

ATOM 14 H3 M -1.268 -3.561 3.381

ATOM 15 O1 M -3.222 2.930 2.903

ATOM 16 H2 M -3.258 2.856 1.962

ATOM 17 H3 M -2.731 3.712 3.095

ATOM 18 O1 M -4.301 -0.820 3.671

ATOM 19 H2 M -4.890 -0.085 3.606

ATOM 20 H3 M -4.241 -1.196 2.807

ATOM 21 O1 M -5.584 1.604 3.466

ATOM 22 H2 M -4.813 2.118 3.286

ATOM 23 H3 M -6.097 2.093 4.089

ATOM 24 O1 M -3.424 2.952 0.131

ATOM 25 H2 M -4.305 3.169 -0.127

ATOM 26 H3 M -2.848 3.492 -0.385

ATOM 27 O1 M -0.765 1.722 -2.138

ATOM 28 H2 M -1.502 1.133 -2.123

ATOM 29 H3 M -0.009 1.217 -1.883

ATOM 30 O1 M -1.790 5.311 2.962

ATOM 31 H2 M -0.900 5.563 3.149

ATOM 32 H3 M -2.014 5.702 2.133

ATOM 33 O1 M 3.737 -1.109 2.022

ATOM 34 H2 M 3.479 -1.511 2.836

ATOM 35 H3 M 4.211 -0.324 2.245

ATOM 36 O1 M -4.188 -1.661 1.009

ATOM 37 H2 M -3.802 -0.996 0.461

ATOM 38 H3 M -4.868 -2.070 0.499

ATOM 39 O1 M -1.735 -2.695 1.861

ATOM 40 H2 M -2.621 -2.491 1.606

ATOM 41 H3 M -1.183 -2.030 1.483

ATOM 42 O1 M 1.101 -3.522 5.713

ATOM 43 H2 M 0.374 -3.666 5.128

ATOM 44 H3 M 1.338 -4.365 6.065

ATOM 45 O1 M 2.752 1.383 7.952

ATOM 46 H2 M 3.204 0.624 7.620

ATOM 47 H3 M 1.850 1.131 8.071

ATOM 48 O1 M 4.442 1.934 5.127

ATOM 49 H2 M 4.633 2.811 5.420

ATOM 50 H3 M 3.503 1.865 5.068

ATOM 51 O1 M -0.659 -1.621 6.880

ATOM 52 H2 M -0.011 -2.243 6.590

ATOM 53 H3 M -1.469 -1.854 6.454

ATOM 54 O1 M -2.130 6.261 0.365

ATOM 55 H2 M -2.007 5.594 -0.290

ATOM 56 H3 M -2.700 6.912 -0.012

ATOM 57 O1 M -2.798 0.279 -0.346

ATOM 58 H2 M -2.988 1.169 -0.095

ATOM 59 H3 M -1.985 0.047 0.074

ATOM 60 O1 M -0.394 -0.533 0.739

ATOM 61 H2 M 0.127 -0.596 -0.044

ATOM 62 H3 M 0.108 -0.031 1.360

ATOM 63 O1 M -2.889 1.189 5.094

ATOM 64 H2 M -2.898 1.824 4.396

ATOM 65 H3 M -3.269 0.398 4.746

ATOM 66 O1 M -1.837 2.637 7.169

ATOM 67 H2 M -1.929 3.475 6.745

ATOM 68 H3 M -2.241 2.000 6.602

ATOM 69 O1 M 0.097 0.759 8.006

ATOM 70 H2 M -0.194 -0.097 7.736

ATOM 71 H3 M -0.591 1.363 7.779

ATOM 72 O1 M -3.090 -2.340 5.616

ATOM 73 H2 M -3.753 -2.444 6.280

ATOM 74 H3 M -3.482 -1.840 4.918

ATOM 75 O1 M 3.548 -1.309 -0.662

ATOM 76 H2 M 3.859 -2.158 -0.931

ATOM 77 H3 M 3.548 -1.306 0.281

ATOM 78 O1 M 3.053 -1.897 4.570

ATOM 79 H2 M 3.470 -1.454 5.292

ATOM 80 H3 M 2.390 -2.456 4.941

ATOM 81 O1 M 5.030 1.299 2.528

ATOM 82 H2 M 4.825 2.133 2.137

ATOM 83 H3 M 4.983 1.419 3.463

ATOM 84 O1 M 3.207 4.956 3.241

ATOM 85 H2 M 3.687 4.778 4.034

ATOM 86 H3 M 3.672 4.527 2.541

ATOM 87 O1 M 4.870 1.159 -0.319

ATOM 88 H2 M 5.267 0.917 0.501

ATOM 89 H3 M 4.471 0.378 -0.668

ATOM 90 O1 M 1.402 0.344 -1.208

ATOM 91 H2 M 2.139 -0.241 -1.269

ATOM 92 H3 M 1.560 0.902 -0.463

ATOM 93 O1 M 4.007 3.443 0.956

ATOM 94 H2 M 3.602 4.120 0.437

ATOM 95 H3 M 4.361 2.812 0.350

ATOM 96 O1 M -1.910 4.971 5.751

ATOM 97 H2 M -1.055 5.326 5.934

ATOM 98 H3 M -2.069 5.108 4.831

ATOM 99 O1 M -1.616 4.294 -1.534

ATOM 100 H2 M -1.433 3.389 -1.726

ATOM 101 H3 M -0.930 4.801 -1.939

ATOM 102 O1 M -0.133 4.046 8.880

ATOM 103 H2 M -0.302 3.748 9.759

ATOM 104 H3 M -0.725 3.575 8.315

ATOM 105 O1 M 0.788 6.131 3.513

ATOM 106 H2 M 0.704 6.224 4.449

ATOM 107 H3 M 1.636 5.749 3.354

ATOM 108 O1 M 4.309 4.605 5.829

ATOM 109 H2 M 4.831 5.302 6.193

ATOM 110 H3 M 3.592 4.464 6.426

ATOM 111 O1 M 2.261 4.034 7.578

ATOM 112 H2 M 1.495 4.129 8.121

ATOM 113 H3 M 2.557 3.144 7.679

ATOM 114 O1 M 0.642 5.955 6.283

ATOM 115 H2 M 1.208 5.244 6.537

ATOM 116 H3 M 0.495 6.475 7.057

ATOM 117 O1 M 4.421 -0.433 6.518

ATOM 118 H2 M 5.264 -0.682 6.861

ATOM 119 H3 M 4.550 0.366 6.034

ATOM 120 O1 M 1.003 3.955 -2.715

ATOM 121 H2 M 0.544 3.136 -2.620

ATOM 122 H3 M 1.581 3.859 -3.455

ATOM 123 O1 M 0.634 6.602 0.746

ATOM 124 H2 M -0.302 6.635 0.637

ATOM 125 H3 M 0.799 6.611 1.676

ATOM 126 O1 M 2.517 5.102 -0.607

ATOM 127 H2 M 1.974 5.738 -0.170

ATOM 128 H3 M 2.030 4.801 -1.358

TER

-----------------------------------------------------------------------

REMARK CH2OH+CH3SH and 53 water molecules

REMARK Equilibrium configuration of the reagents

REMARK QM(RHF/6-31G**)/MM(OPLSAA;TIP3P)

REMARK Energy -552.95430 au

ATOM 1 H Q 1.045 0.288 4.409

ATOM 2 C Q 0.171 0.827 4.742

ATOM 3 H Q -0.105 0.497 5.731

ATOM 4 H Q -0.649 0.656 4.063

ATOM 5 SH Q 0.528 2.608 4.849

ATOM 6 HS Q 0.662 2.851 3.552

ATOM 7 C Q 0.785 3.024 1.116

ATOM 8 H Q 1.117 4.047 1.124

ATOM 9 H Q -0.266 2.812 1.126

ATOM 10 O Q 1.509 2.130 0.403

ATOM 11 H Q 2.420 2.396 0.370

ATOM 12 O1 M -0.663 -2.795 3.441

ATOM 13 H2 M -1.363 -2.570 4.033

ATOM 14 H3 M -1.069 -3.096 2.643

ATOM 15 O1 M -2.707 2.328 2.851

ATOM 16 H2 M -2.813 2.216 1.919

ATOM 17 H3 M -2.243 3.140 2.976

ATOM 18 O1 M -4.645 -0.888 3.543

ATOM 19 H2 M -5.069 -0.078 3.308

ATOM 20 H3 M -4.721 -1.460 2.796

ATOM 21 O1 M -5.442 1.702 2.930

ATOM 22 H2 M -4.543 1.986 2.891

ATOM 23 H3 M -5.919 2.375 3.388

ATOM 24 O1 M -3.426 2.382 0.178

ATOM 25 H2 M -4.253 2.835 0.225

ATOM 26 H3 M -2.980 2.711 -0.585

ATOM 27 O1 M 0.129 1.820 -2.147

ATOM 28 H2 M 0.194 0.947 -2.499

ATOM 29 H3 M 0.553 1.805 -1.303

ATOM 30 O1 M -1.546 4.880 2.698

ATOM 31 H2 M -0.802 5.291 3.108

ATOM 32 H3 M -1.487 5.068 1.775

ATOM 33 O1 M 3.518 -0.987 2.797

ATOM 34 H2 M 3.445 -1.323 3.676

ATOM 35 H3 M 3.897 -0.126 2.867

ATOM 36 O1 M -4.819 -2.309 1.169

ATOM 37 H2 M -4.445 -1.598 0.673

ATOM 38 H3 M -5.562 -2.620 0.677

ATOM 39 O1 M -2.136 -3.201 1.206

ATOM 40 H2 M -3.070 -3.067 1.229

ATOM 41 H3 M -1.796 -2.620 0.544

ATOM 42 O1 M 0.865 -3.341 5.665

ATOM 43 H2 M 0.455 -3.188 4.829

ATOM 44 H3 M 1.070 -4.262 5.702

ATOM 45 O1 M 1.727 1.444 8.590

ATOM 46 H2 M 2.221 0.925 7.975

ATOM 47 H3 M 0.915 0.989 8.739

ATOM 48 O1 M 3.855 2.926 5.305

ATOM 49 H2 M 4.064 3.418 6.084

ATOM 50 H3 M 2.915 2.858 5.272

ATOM 51 O1 M -0.983 -1.733 6.988

ATOM 52 H2 M -0.276 -2.287 6.698

ATOM 53 H3 M -1.697 -1.866 6.385

ATOM 54 O1 M -1.758 5.264 -0.040

ATOM 55 H2 M -1.908 4.680 -0.766

ATOM 56 H3 M -2.519 5.818 0.023

ATOM 57 O1 M -3.518 -0.360 -0.120

ATOM 58 H2 M -3.534 0.575 -0.000

ATOM 59 H3 M -2.615 -0.600 -0.256

ATOM 60 O1 M -0.916 -1.182 -0.331

ATOM 61 H2 M -0.479 -1.096 -1.163

ATOM 62 H3 M -0.247 -1.139 0.333

ATOM 63 O1 M -3.463 1.060 5.231

ATOM 64 H2 M -3.050 1.477 4.492

ATOM 65 H3 M -3.878 0.278 4.904

ATOM 66 O1 M -2.437 2.159 7.547

ATOM 67 H2 M -2.338 3.010 7.149

ATOM 68 H3 M -2.871 1.612 6.912

ATOM 69 O1 M -0.775 0.313 8.763

ATOM 70 H2 M -0.865 -0.479 8.258

ATOM 71 H3 M -1.376 0.940 8.393

ATOM 72 O1 M -2.896 -2.375 5.051

ATOM 73 H2 M -3.432 -3.071 5.396

ATOM 74 H3 M -3.464 -1.825 4.535

ATOM 75 O1 M 4.769 -2.102 0.669

ATOM 76 H2 M 5.207 -2.915 0.865

ATOM 77 H3 M 4.340 -1.826 1.463

ATOM 78 O1 M 3.137 -1.731 5.336

ATOM 79 H2 M 3.357 -1.095 5.998

ATOM 80 H3 M 2.411 -2.232 5.672

ATOM 81 O1 M 4.626 1.499 2.990

ATOM 82 H2 M 4.472 2.140 2.314

ATOM 83 H3 M 4.530 1.947 3.815

ATOM 84 O1 M 3.317 5.476 3.744

ATOM 85 H2 M 3.749 4.673 3.987

ATOM 86 H3 M 3.717 5.766 2.940

ATOM 87 O1 M 5.693 0.539 0.396

ATOM 88 H2 M 5.667 0.819 1.296

ATOM 89 H3 M 5.544 -0.392 0.397

ATOM 90 O1 M 2.611 -0.986 -0.694

ATOM 91 H2 M 3.397 -1.445 -0.444

ATOM 92 H3 M 2.054 -0.967 0.067

ATOM 93 O1 M 4.186 3.333 1.034

ATOM 94 H2 M 4.088 4.248 1.247

ATOM 95 H3 M 4.718 3.292 0.255

ATOM 96 O1 M -2.236 4.466 6.037

ATOM 97 H2 M -2.147 5.394 6.180

ATOM 98 H3 M -1.448 4.182 5.602

ATOM 99 O1 M -2.115 3.378 -2.042

ATOM 100 H2 M -1.331 2.854 -2.076

ATOM 101 H3 M -2.369 3.544 -2.936

ATOM 102 O1 M -1.332 3.617 9.755

ATOM 103 H2 M -1.227 3.026 10.483

ATOM 104 H3 M -1.890 3.182 9.130

ATOM 105 O1 M 0.639 6.039 3.972

ATOM 106 H2 M 0.619 5.954 4.912

ATOM 107 H3 M 1.532 5.892 3.706

ATOM 108 O1 M 3.739 4.439 7.667

ATOM 109 H2 M 3.857 5.315 7.335

ATOM 110 H3 M 2.881 4.412 8.059

ATOM 111 O1 M 1.088 4.096 8.563

ATOM 112 H2 M 0.296 4.144 9.075

ATOM 113 H3 M 1.346 3.188 8.548

ATOM 114 O1 M 0.631 6.058 6.694

ATOM 115 H2 M 0.762 5.389 7.347

ATOM 116 H3 M -0.194 6.470 6.890

ATOM 117 O1 M 3.772 0.475 6.867

ATOM 118 H2 M 4.255 0.757 7.627

ATOM 119 H3 M 3.927 1.117 6.193

ATOM 120 O1 M 2.412 3.538 -2.462

ATOM 121 H2 M 1.566 3.139 -2.585

ATOM 122 H3 M 3.006 2.846 -2.219

ATOM 123 O1 M 0.498 6.827 -0.082

ATOM 124 H2 M -0.192 6.189 -0.170

ATOM 125 H3 M 0.122 7.575 0.353

ATOM 126 O1 M 2.860 5.837 -1.028

ATOM 127 H2 M 2.071 6.287 -0.772

ATOM 128 H3 M 2.599 5.139 -1.607

ATOM 129 O1 M 5.291 4.413 -1.307

ATOM 130 H2 M 5.339 3.958 -2.133

ATOM 131 H3 M 4.553 4.998 -1.361

ATOM 132 O1 M 4.327 6.089 1.284

ATOM 133 H2 M 3.775 6.169 0.522

ATOM 134 H3 M 5.193 6.356 1.021

ATOM 135 O1 M 1.043 -1.370 1.646

ATOM 136 H2 M 0.516 -1.847 2.267

ATOM 137 H3 M 1.863 -1.183 2.074

ATOM 138 O1 M -1.483 8.238 1.343

ATOM 139 H2 M -1.478 8.338 2.281

ATOM 140 H3 M -2.321 7.868 1.114

ATOM 141 O1 M -0.812 8.361 4.079

ATOM 142 H2 M -0.283 7.591 3.945

ATOM 143 H3 M -0.228 9.101 4.046

ATOM 144 O1 M 3.285 6.759 6.231

ATOM 145 H2 M 2.364 6.706 6.432

ATOM 146 H3 M 3.381 6.492 5.330

ATOM 147 O1 M -3.905 6.865 0.744

ATOM 148 H2 M -4.685 7.336 0.498

ATOM 149 H3 M -4.129 6.341 1.496

ATOM 150 O1 M -4.703 3.630 5.125

ATOM 151 H2 M -4.635 2.711 5.328

ATOM 152 H3 M -3.956 4.051 5.518

ATOM 153 O1 M 0.688 -0.859 -2.607

ATOM 154 H2 M 0.850 -1.410 -3.356

ATOM 155 H3 M 1.444 -0.933 -2.047

ATOM 156 O1 M -1.918 7.192 6.341

ATOM 157 H2 M -2.551 7.731 6.787

ATOM 158 H3 M -1.667 7.659 5.560

ATOM 159 O1 M 3.851 1.414 -1.463

ATOM 160 H2 M 3.325 0.643 -1.328

ATOM 161 H3 M 4.656 1.281 -0.988

ATOM 162 O1 M -4.272 5.258 2.900

ATOM 163 H2 M -3.338 5.131 2.953

ATOM 164 H3 M -4.650 4.800 3.634

ATOM 165 O1 M -0.948 1.363 11.309

ATOM 166 H2 M -0.688 0.766 11.992

ATOM 167 H3 M -0.863 0.895 10.493

ATOM 168 O1 M 4.520 2.085 8.988

ATOM 169 H2 M 4.536 2.962 8.641

ATOM 170 H3 M 3.660 1.954 9.356

TER

-----------------------------------------------------------------------

REMARK CH2OH+CH3SH and 53 water molecules

REMARK Configuration of the barrier

REMARK QM(RHF/6-31G**)/MM(OPLSAA;TIP3P)

REMARK Energy -552.92755 au

ATOM 1 H Q 1.109 0.141 4.094

ATOM 2 C Q 0.210 0.679 4.352

ATOM 3 H Q -0.122 0.383 5.336

ATOM 4 H Q -0.569 0.457 3.640

ATOM 5 SH Q 0.532 2.468 4.399

ATOM 6 HS Q 0.693 2.683 2.889

ATOM 7 C Q 0.846 2.885 1.458

ATOM 8 H Q 1.174 3.913 1.440

ATOM 9 H Q -0.180 2.730 1.173

ATOM 10 O Q 1.679 1.978 0.900

ATOM 11 H Q 2.572 2.305 0.883

ATOM 12 O1 M -0.623 -2.918 3.406

ATOM 13 H2 M -1.299 -2.667 4.015

ATOM 14 H3 M -1.059 -3.204 2.619

ATOM 15 O1 M -3.081 2.803 2.839

ATOM 16 H2 M -3.142 2.608 1.918

ATOM 17 H3 M -2.368 3.412 2.942

ATOM 18 O1 M -4.559 -0.891 3.596

ATOM 19 H2 M -5.069 -0.116 3.419

ATOM 20 H3 M -4.660 -1.457 2.848

ATOM 21 O1 M -5.606 1.607 3.090

ATOM 22 H2 M -4.778 2.059 3.050

ATOM 23 H3 M -6.246 2.239 3.378

ATOM 24 O1 M -3.572 2.472 0.144

ATOM 25 H2 M -4.444 2.793 -0.025

ATOM 26 H3 M -3.039 2.739 -0.587

ATOM 27 O1 M 0.206 1.709 -1.764

ATOM 28 H2 M 0.243 0.868 -2.191

ATOM 29 H3 M 0.674 1.621 -0.950

ATOM 30 O1 M -1.356 4.928 2.653

ATOM 31 H2 M -0.668 5.422 3.069

ATOM 32 H3 M -1.387 5.209 1.753

ATOM 33 O1 M 3.602 -1.025 2.735

ATOM 34 H2 M 3.523 -1.376 3.608

ATOM 35 H3 M 3.990 -0.169 2.821

ATOM 36 O1 M -4.833 -2.290 1.218

ATOM 37 H2 M -4.454 -1.565 0.746

ATOM 38 H3 M -5.587 -2.571 0.724

ATOM 39 O1 M -2.177 -3.241 1.207

ATOM 40 H2 M -3.108 -3.096 1.258

ATOM 41 H3 M -1.842 -2.628 0.572

ATOM 42 O1 M 0.939 -3.416 5.618

ATOM 43 H2 M 0.510 -3.286 4.788

ATOM 44 H3 M 1.117 -4.340 5.689

ATOM 45 O1 M 1.645 1.463 8.445

ATOM 46 H2 M 2.126 0.933 7.830

ATOM 47 H3 M 0.846 1.000 8.637

ATOM 48 O1 M 3.755 2.863 5.223

ATOM 49 H2 M 3.865 3.370 6.012

ATOM 50 H3 M 2.825 2.789 5.076

ATOM 51 O1 M -0.846 -1.740 6.951

ATOM 52 H2 M -0.147 -2.302 6.657

ATOM 53 H3 M -1.567 -1.870 6.356

ATOM 54 O1 M -1.728 5.303 -0.073

ATOM 55 H2 M -1.891 4.677 -0.760

ATOM 56 H3 M -2.550 5.734 0.101

ATOM 57 O1 M -3.516 -0.298 0.008

ATOM 58 H2 M -3.539 0.640 0.107

ATOM 59 H3 M -2.611 -0.535 -0.122

ATOM 60 O1 M -0.927 -1.171 -0.241

ATOM 61 H2 M -0.511 -1.129 -1.087

ATOM 62 H3 M -0.235 -1.208 0.399

ATOM 63 O1 M -3.223 1.058 5.119

ATOM 64 H2 M -3.035 1.679 4.433

ATOM 65 H3 M -3.675 0.336 4.714

ATOM 66 O1 M -2.403 2.154 7.480

ATOM 67 H2 M -2.166 2.959 7.047

ATOM 68 H3 M -2.805 1.603 6.827

ATOM 69 O1 M -0.815 0.287 8.754

ATOM 70 H2 M -0.843 -0.496 8.229

ATOM 71 H3 M -1.404 0.904 8.350

ATOM 72 O1 M -2.795 -2.408 5.068

ATOM 73 H2 M -3.352 -3.064 5.454

ATOM 74 H3 M -3.358 -1.822 4.587

ATOM 75 O1 M 4.860 -2.124 0.601

ATOM 76 H2 M 5.299 -2.936 0.794

ATOM 77 H3 M 4.429 -1.853 1.396

ATOM 78 O1 M 3.197 -1.807 5.257

ATOM 79 H2 M 3.376 -1.142 5.902

ATOM 80 H3 M 2.470 -2.314 5.584

ATOM 81 O1 M 4.768 1.446 3.005

ATOM 82 H2 M 4.680 2.120 2.350

ATOM 83 H3 M 4.588 1.852 3.838

ATOM 84 O1 M 3.338 5.501 3.844

ATOM 85 H2 M 3.719 4.669 4.078

ATOM 86 H3 M 3.777 5.788 3.059

ATOM 87 O1 M 5.783 0.521 0.393

ATOM 88 H2 M 5.802 0.766 1.304

ATOM 89 H3 M 5.639 -0.411 0.366

ATOM 90 O1 M 2.656 -1.030 -0.703

ATOM 91 H2 M 3.466 -1.466 -0.494

ATOM 92 H3 M 2.109 -1.092 0.063

ATOM 93 O1 M 4.286 3.361 1.145

ATOM 94 H2 M 4.214 4.270 1.388

ATOM 95 H3 M 4.726 3.337 0.310

ATOM 96 O1 M -1.978 4.305 5.846

ATOM 97 H2 M -1.842 5.239 5.834

ATOM 98 H3 M -1.317 3.928 5.287

ATOM 99 O1 M -2.019 3.287 -1.967

ATOM 100 H2 M -1.249 2.747 -1.886

ATOM 101 H3 M -2.123 3.475 -2.886

ATOM 102 O1 M -1.435 3.625 9.698

ATOM 103 H2 M -1.312 3.040 10.429

ATOM 104 H3 M -1.941 3.153 9.056

ATOM 105 O1 M 0.707 6.261 3.960

ATOM 106 H2 M 0.623 6.171 4.895

ATOM 107 H3 M 1.600 6.043 3.745

ATOM 108 O1 M 3.591 4.409 7.529

ATOM 109 H2 M 3.747 5.303 7.272

ATOM 110 H3 M 2.726 4.382 7.906

ATOM 111 O1 M 0.938 4.104 8.405

ATOM 112 H2 M 0.162 4.150 8.941

ATOM 113 H3 M 1.198 3.197 8.382

ATOM 114 O1 M 0.555 6.216 6.678

ATOM 115 H2 M 0.651 5.504 7.289

ATOM 116 H3 M -0.308 6.573 6.811

ATOM 117 O1 M 3.705 0.443 6.766

ATOM 118 H2 M 4.190 0.718 7.527

ATOM 119 H3 M 3.818 1.117 6.114

ATOM 120 O1 M 2.308 3.578 -2.105

ATOM 121 H2 M 1.481 3.135 -2.206

ATOM 122 H3 M 2.950 2.914 -1.914

ATOM 123 O1 M 0.395 7.027 -0.119

ATOM 124 H2 M -0.256 6.351 -0.213

ATOM 125 H3 M -0.035 7.767 0.276

ATOM 126 O1 M 2.800 5.939 -0.817

ATOM 127 H2 M 2.023 6.440 -0.624

ATOM 128 H3 M 2.524 5.198 -1.333

ATOM 129 O1 M 5.217 4.509 -1.245

ATOM 130 H2 M 5.241 4.088 -2.089

ATOM 131 H3 M 4.482 5.102 -1.259

ATOM 132 O1 M 4.389 6.113 1.410

ATOM 133 H2 M 3.800 6.206 0.679

ATOM 134 H3 M 5.237 6.404 1.115

ATOM 135 O1 M 1.119 -1.534 1.609

ATOM 136 H2 M 0.609 -2.022 2.235

ATOM 137 H3 M 1.925 -1.298 2.041

ATOM 138 O1 M -1.708 8.309 1.258

ATOM 139 H2 M -1.569 8.437 2.182

ATOM 140 H3 M -2.490 7.787 1.171

ATOM 141 O1 M -0.843 8.512 3.895

ATOM 142 H2 M -0.253 7.778 3.823

ATOM 143 H3 M -0.306 9.284 3.979

ATOM 144 O1 M 3.247 6.855 6.293

ATOM 145 H2 M 2.322 6.842 6.478

ATOM 146 H3 M 3.351 6.557 5.403

ATOM 147 O1 M -3.971 6.597 0.961

ATOM 148 H2 M -4.742 7.074 0.698

ATOM 149 H3 M -4.207 6.104 1.731

ATOM 150 O1 M -4.617 5.070 5.880

ATOM 151 H2 M -5.042 4.823 6.686

ATOM 152 H3 M -3.750 4.697 5.905

ATOM 153 O1 M 0.653 -0.908 -2.534

ATOM 154 H2 M 0.783 -1.412 -3.321

ATOM 155 H3 M 1.438 -1.002 -2.019

ATOM 156 O1 M -2.057 7.053 5.918

ATOM 157 H2 M -2.990 7.172 6.003

ATOM 158 H3 M -1.769 7.642 5.239

ATOM 159 O1 M 3.848 1.443 -1.333

ATOM 160 H2 M 3.342 0.654 -1.223

ATOM 161 H3 M 4.674 1.298 -0.901

ATOM 162 O1 M -4.704 5.091 3.117

ATOM 163 H2 M -4.106 4.363 3.062

ATOM 164 H3 M -4.844 5.259 4.035

ATOM 165 O1 M -0.976 1.395 11.270

ATOM 166 H2 M -0.643 0.834 11.952

ATOM 167 H3 M -0.903 0.912 10.462

ATOM 168 O1 M 4.410 2.084 8.892

ATOM 169 H2 M 4.432 2.956 8.534

ATOM 170 H3 M 3.530 1.941 9.204

TER

-----------------------------------------------------------------------

REMARK CH2OH+CH3SH and 53 water molecules

REMARK Equilibrium configuration of the products

REMARK QM(RHF/6-31G**)/MM(OPLSAA;TIP3P)

REMARK Energy -552.97957 au

ATOM 1 H Q 1.444 0.268 4.663

ATOM 2 C Q 0.532 0.736 4.998

ATOM 3 H Q 0.347 0.454 6.026

ATOM 4 H Q -0.309 0.416 4.406

ATOM 5 SH Q 0.679 2.537 4.965

ATOM 6 HS Q 1.407 1.563 2.198

ATOM 7 C Q 0.815 1.958 1.382

ATOM 8 H Q 0.469 2.952 1.639

ATOM 9 H Q -0.038 1.311 1.237

ATOM 10 O Q 1.559 1.972 0.185

ATOM 11 H Q 2.296 2.560 0.289

ATOM 12 O1 M -0.804 -2.881 3.716

ATOM 13 H2 M -1.500 -2.716 4.331

ATOM 14 H3 M -1.214 -3.087 2.891

ATOM 15 O1 M -3.048 2.634 2.475

ATOM 16 H2 M -3.071 2.515 1.539

ATOM 17 H3 M -2.347 3.241 2.653

ATOM 18 O1 M -4.626 -1.014 3.841

ATOM 19 H2 M -5.133 -0.220 3.776

ATOM 20 H3 M -4.734 -1.472 3.023

ATOM 21 O1 M -5.483 1.589 3.465

ATOM 22 H2 M -4.732 1.875 2.971

ATOM 23 H3 M -5.642 2.247 4.123

ATOM 24 O1 M -3.540 2.556 -0.252

ATOM 25 H2 M -4.410 2.886 -0.414

ATOM 26 H3 M -2.979 2.936 -0.909

ATOM 27 O1 M 0.147 2.073 -2.269

ATOM 28 H2 M 0.068 1.195 -2.607

ATOM 29 H3 M 0.576 2.004 -1.431

ATOM 30 O1 M -1.326 4.757 2.877

ATOM 31 H2 M -0.537 5.144 3.222

ATOM 32 H3 M -1.382 5.016 1.971

ATOM 33 O1 M 3.388 -0.957 2.766

ATOM 34 H2 M 3.391 -1.324 3.635

ATOM 35 H3 M 3.777 -0.100 2.832

ATOM 36 O1 M -4.897 -2.097 1.316

ATOM 37 H2 M -4.503 -1.393 0.825

ATOM 38 H3 M -5.653 -2.379 0.827

ATOM 39 O1 M -2.252 -3.066 1.430

ATOM 40 H2 M -3.181 -2.897 1.433

ATOM 41 H3 M -1.880 -2.528 0.750

ATOM 42 O1 M 0.927 -3.274 5.805

ATOM 43 H2 M 0.430 -3.161 5.011

ATOM 44 H3 M 1.120 -4.195 5.876

ATOM 45 O1 M 1.727 1.394 8.776

ATOM 46 H2 M 2.215 0.871 8.160

ATOM 47 H3 M 0.858 1.028 8.813

ATOM 48 O1 M 4.011 2.915 5.386

ATOM 49 H2 M 4.213 3.394 6.174

ATOM 50 H3 M 3.071 2.929 5.294

ATOM 51 O1 M -0.964 -1.708 7.160

ATOM 52 H2 M -0.242 -2.237 6.863

ATOM 53 H3 M -1.698 -1.911 6.602

ATOM 54 O1 M -1.684 5.266 0.209

ATOM 55 H2 M -1.791 4.798 -0.603

ATOM 56 H3 M -2.442 5.819 0.306

ATOM 57 O1 M -3.552 -0.203 -0.023

ATOM 58 H2 M -3.543 0.735 -0.120

ATOM 59 H3 M -2.664 -0.497 -0.147

ATOM 60 O1 M -0.994 -1.163 -0.237

ATOM 61 H2 M -0.566 -1.025 -1.067

ATOM 62 H3 M -0.312 -1.241 0.410

ATOM 63 O1 M -2.777 0.895 4.709

ATOM 64 H2 M -2.808 1.488 3.975

ATOM 65 H3 M -3.331 0.163 4.489

ATOM 66 O1 M -2.372 2.382 6.961

ATOM 67 H2 M -2.353 3.214 6.515

ATOM 68 H3 M -2.552 1.727 6.305

ATOM 69 O1 M -0.913 0.600 8.575

ATOM 70 H2 M -0.979 -0.255 8.182

ATOM 71 H3 M -1.447 1.179 8.055

ATOM 72 O1 M -2.978 -2.531 5.417

ATOM 73 H2 M -3.528 -3.188 5.813

ATOM 74 H3 M -3.545 -1.975 4.906

ATOM 75 O1 M 4.386 -1.744 0.373

ATOM 76 H2 M 4.750 -2.615 0.403

ATOM 77 H3 M 4.010 -1.578 1.223

ATOM 78 O1 M 3.208 -1.714 5.343

ATOM 79 H2 M 3.440 -1.095 6.016

ATOM 80 H3 M 2.486 -2.221 5.679

ATOM 81 O1 M 4.484 1.554 2.958

ATOM 82 H2 M 4.250 2.242 2.355

ATOM 83 H3 M 4.517 1.946 3.816

ATOM 84 O1 M 3.585 5.618 3.823

ATOM 85 H2 M 4.098 4.852 4.029

ATOM 86 H3 M 3.954 5.988 3.037

ATOM 87 O1 M 5.516 0.824 0.331

ATOM 88 H2 M 5.495 1.044 1.249

ATOM 89 H3 M 5.291 -0.089 0.266

ATOM 90 O1 M 2.667 -0.295 -1.238

ATOM 91 H2 M 3.261 -0.875 -0.790

ATOM 92 H3 M 2.326 0.298 -0.588

ATOM 93 O1 M 3.871 3.546 1.191

ATOM 94 H2 M 3.658 4.434 1.430

ATOM 95 H3 M 4.498 3.597 0.488

ATOM 96 O1 M -2.632 4.669 5.391

ATOM 97 H2 M -2.423 5.511 5.763

ATOM 98 H3 M -2.173 4.613 4.569

ATOM 99 O1 M -1.949 3.798 -2.128

ATOM 100 H2 M -1.211 3.213 -2.187

ATOM 101 H3 M -2.032 4.215 -2.971

ATOM 102 O1 M -1.502 3.902 9.185

ATOM 103 H2 M -1.591 3.377 9.965

ATOM 104 H3 M -1.931 3.429 8.490

ATOM 105 O1 M 0.868 6.023 3.982

ATOM 106 H2 M 0.798 5.913 4.917

ATOM 107 H3 M 1.776 5.894 3.761

ATOM 108 O1 M 3.809 4.400 7.766

ATOM 109 H2 M 3.927 5.280 7.447

ATOM 110 H3 M 2.938 4.357 8.126

ATOM 111 O1 M 1.156 4.059 8.588

ATOM 112 H2 M 0.275 4.148 8.914

ATOM 113 H3 M 1.396 3.153 8.698

ATOM 114 O1 M 0.678 6.005 6.692

ATOM 115 H2 M 0.821 5.350 7.357

ATOM 116 H3 M -0.201 6.326 6.813

ATOM 117 O1 M 3.782 0.474 6.955

ATOM 118 H2 M 4.252 0.746 7.727

ATOM 119 H3 M 3.956 1.121 6.290

ATOM 120 O1 M 2.365 3.873 -2.452

ATOM 121 H2 M 1.568 3.379 -2.559

ATOM 122 H3 M 3.067 3.245 -2.397

ATOM 123 O1 M 0.469 6.987 0.067

ATOM 124 H2 M -0.154 6.279 0.063

ATOM 125 H3 M 0.034 7.731 0.451

ATOM 126 O1 M 2.849 6.077 -0.899

ATOM 127 H2 M 2.060 6.507 -0.609

ATOM 128 H3 M 2.585 5.420 -1.524

ATOM 129 O1 M 5.261 4.544 -1.006

ATOM 130 H2 M 5.200 3.845 -1.636

ATOM 131 H3 M 4.575 5.158 -1.214

ATOM 132 O1 M 4.451 6.328 1.340

ATOM 133 H2 M 3.856 6.467 0.621

ATOM 134 H3 M 5.312 6.234 0.965

ATOM 135 O1 M 0.819 -1.488 1.797

ATOM 136 H2 M 0.384 -1.946 2.499

ATOM 137 H3 M 1.698 -1.313 2.091

ATOM 138 O1 M -1.556 8.347 1.458

ATOM 139 H2 M -1.423 8.392 2.392

ATOM 140 H3 M -2.370 7.888 1.323

ATOM 141 O1 M -0.582 8.345 4.093

ATOM 142 H2 M -0.064 7.569 3.948

ATOM 143 H3 M 0.009 9.079 4.044

ATOM 144 O1 M 3.354 6.742 6.377

ATOM 145 H2 M 2.423 6.689 6.524

ATOM 146 H3 M 3.497 6.537 5.467

ATOM 147 O1 M -3.871 6.800 0.976

ATOM 148 H2 M -4.610 7.307 0.682

ATOM 149 H3 M -4.203 6.169 1.595

ATOM 150 O1 M -5.237 3.788 5.228

ATOM 151 H2 M -5.590 3.725 6.101

ATOM 152 H3 M -4.336 4.054 5.318

ATOM 153 O1 M 0.392 -0.695 -2.633

ATOM 154 H2 M 0.468 -1.334 -3.324

ATOM 155 H3 M 1.246 -0.619 -2.238

ATOM 156 O1 M -1.864 7.177 6.246

ATOM 157 H2 M -2.319 7.803 6.785

ATOM 158 H3 M -1.523 7.653 5.505

ATOM 159 O1 M 4.290 1.943 -1.868

ATOM 160 H2 M 3.736 1.190 -1.996

ATOM 161 H3 M 4.917 1.709 -1.202

ATOM 162 O1 M -4.806 4.855 2.624

ATOM 163 H2 M -4.213 4.124 2.548

ATOM 164 H3 M -5.260 4.752 3.445

ATOM 165 O1 M -1.511 1.807 10.981

ATOM 166 H2 M -1.326 1.280 11.742

ATOM 167 H3 M -1.289 1.284 10.227

ATOM 168 O1 M 4.540 2.037 9.099

ATOM 169 H2 M 4.556 2.914 8.751

ATOM 170 H3 M 3.695 1.921 9.503

TER

-----------------------------------------------------------------------

REMARK CH2OH+GSH (conformation A) and 44 water molecules

REMARK Equilibrium configuration of the reagents

REMARK QM(RHF/6-31G**)/MM(OPLSAA;TIP3P)

REMARK Energy -551.90903 au

ATOM 5 SH Q 1.149 2.667 4.949

ATOM 6 HS Q 1.148 3.332 3.819

ATOM 7 C Q 0.102 3.728 1.493

ATOM 8 H Q 0.972 4.349 1.589

ATOM 9 H Q -0.589 3.668 2.299

ATOM 10 O Q 0.278 2.545 0.824

ATOM 11 H Q 1.074 2.595 0.316

ATOM 12 C1 M -4.543 1.433 0.835

ATOM 13 O2 M -5.337 1.321 -0.122

ATOM 14 O3 M -4.737 2.020 1.915

ATOM 15 C1 M -3.145 0.889 0.644

ATOM 16 H2 M -3.111 0.449 -0.352

ATOM 17 N1 M -2.234 2.043 0.666

ATOM 18 H2 M -1.247 1.789 0.474

ATOM 19 H3 M -2.283 2.416 1.603

ATOM 20 H4 M -2.609 2.757 0.051

ATOM 21 C1 M -2.820 -0.240 1.668

ATOM 22 H2 M -2.143 -0.981 1.249

ATOM 23 H3 M -3.776 -0.759 1.741

ATOM 24 C1 M -2.522 0.060 3.152

ATOM 25 H2 M -3.381 0.582 3.572

ATOM 26 H3 M -2.531 -0.926 3.614

ATOM 27 C M -1.184 0.722 3.322

ATOM 28 O M -1.087 1.948 3.298

ATOM 29 N M -0.108 -0.073 3.399

ATOM 30 H M -0.245 -1.072 3.349

ATOM 31 CA M 1.243 0.376 3.143

ATOM 32 HA M 1.238 1.046 2.282

ATOM 33 CB M 1.824 1.120 4.367

ATOM 34 HB1 M 2.871 1.231 4.081

ATOM 35 HB2 M 1.774 0.419 5.201

ATOM 36 C M 2.033 -0.858 2.717

ATOM 37 O M 2.873 -1.364 3.459

ATOM 38 N M 1.755 -1.366 1.508

ATOM 39 H M 1.105 -0.871 0.917

ATOM 40 C1 M 2.275 -2.597 0.939

ATOM 41 H2 M 3.362 -2.644 0.873

ATOM 42 H3 M 1.911 -3.486 1.457

ATOM 43 C1 M 1.740 -2.753 -0.477

ATOM 44 O2 M 0.533 -2.518 -0.660

ATOM 45 O3 M 2.539 -3.055 -1.391

ATOM 46 O1 M -0.736 -2.866 3.692

ATOM 47 H2 M -1.519 -3.065 4.180

ATOM 48 H3 M -0.872 -3.192 2.817

ATOM 49 O1 M -3.475 4.745 3.650

ATOM 50 H2 M -4.215 4.702 3.066

ATOM 51 H3 M -2.842 5.315 3.245

ATOM 52 O1 M -5.072 -1.640 4.100

ATOM 53 H2 M -5.458 -0.785 4.196

ATOM 54 H3 M -5.400 -1.996 3.290

ATOM 55 O1 M -5.953 1.041 4.007

ATOM 56 H2 M -5.552 1.394 3.229

ATOM 57 H3 M -6.868 1.269 3.967

ATOM 58 O1 M -5.406 4.522 1.639

ATOM 59 H2 M -6.301 4.610 1.356

ATOM 60 H3 M -5.239 3.597 1.725

ATOM 61 O1 M -1.982 1.690 -2.662

ATOM 62 H2 M -2.185 0.830 -2.992

ATOM 63 H3 M -1.052 1.708 -2.505

ATOM 64 O1 M -1.572 6.318 2.549

ATOM 65 H2 M -0.772 6.334 3.050

ATOM 66 H3 M -1.326 6.401 1.641

ATOM 67 O1 M 4.370 0.305 0.503

ATOM 68 H2 M 4.202 -0.607 0.676

ATOM 69 H3 M 4.856 0.636 1.240

ATOM 70 O1 M -3.561 -2.880 -0.403

ATOM 71 H2 M -4.232 -2.314 -0.749

ATOM 72 H3 M -3.010 -3.124 -1.130

ATOM 73 O1 M -5.653 -2.506 1.543

ATOM 74 H2 M -6.008 -2.001 0.829

ATOM 75 H3 M -4.970 -3.047 1.180

ATOM 76 O1 M -1.280 -3.418 1.139

ATOM 77 H2 M -2.078 -3.396 0.635

ATOM 78 H3 M -0.580 -3.197 0.546

ATOM 79 O1 M 1.298 -2.621 5.483

ATOM 80 H2 M 0.674 -2.873 4.822

ATOM 81 H3 M 2.112 -2.449 5.037

ATOM 82 O1 M 2.882 1.420 7.804

ATOM 83 H2 M 3.231 0.688 8.288

ATOM 84 H3 M 1.950 1.284 7.742

ATOM 85 O1 M 4.774 1.833 5.686

ATOM 86 H2 M 4.782 2.746 5.450

ATOM 87 H3 M 4.299 1.767 6.499

ATOM 88 O1 M -0.936 -1.375 6.524

ATOM 89 H2 M -0.163 -1.878 6.325

ATOM 90 H3 M -1.672 -1.868 6.198

ATOM 91 O1 M -3.332 4.503 -0.245

ATOM 92 H2 M -3.767 4.167 -1.012

ATOM 93 H3 M -4.007 4.715 0.378

ATOM 94 O1 M -5.725 -1.140 -0.965

ATOM 95 H2 M -5.621 -0.250 -0.667

ATOM 96 H3 M -6.264 -1.105 -1.738

ATOM 97 O1 M -0.267 -0.104 -0.184

ATOM 98 H2 M -0.077 -0.995 -0.429

ATOM 99 H3 M 0.048 0.443 -0.884

ATOM 100 O1 M -3.853 2.473 5.348

ATOM 101 H2 M -3.741 3.183 4.736

ATOM 102 H3 M -4.592 1.969 5.047

ATOM 103 O1 M -1.770 2.881 7.156

ATOM 104 H2 M -1.626 3.728 6.766

ATOM 105 H3 M -2.519 2.505 6.720

ATOM 106 O1 M 0.892 -1.274 -3.263

ATOM 107 H2 M 1.780 -1.331 -3.580

ATOM 108 H3 M 0.829 -1.863 -2.528

ATOM 109 O1 M -1.473 -3.424 -2.152

ATOM 110 H2 M -1.054 -4.056 -2.714

ATOM 111 H3 M -0.804 -3.085 -1.579

ATOM 112 O1 M 0.974 -4.585 -3.101

ATOM 113 H2 M 1.359 -4.093 -2.394

ATOM 114 H3 M 1.683 -4.856 -3.661

ATOM 115 O1 M -1.862 -0.948 -3.435

ATOM 116 H2 M -2.076 -1.793 -3.072

ATOM 117 H3 M -0.943 -0.969 -3.649

ATOM 118 O1 M 0.247 0.928 7.296

ATOM 119 H2 M -0.185 0.107 7.125

ATOM 120 H3 M -0.424 1.591 7.308

ATOM 121 O1 M -3.002 -2.926 5.325

ATOM 122 H2 M -3.370 -3.621 5.847

ATOM 123 H3 M -3.728 -2.466 4.936

ATOM 124 O1 M 3.699 -1.421 -3.127

ATOM 125 H2 M 4.253 -1.999 -3.627

ATOM 126 H3 M 3.342 -1.932 -2.418

ATOM 127 O1 M 4.023 -4.438 -3.060

ATOM 128 H2 M 4.530 -5.081 -2.591

ATOM 129 H3 M 3.512 -3.974 -2.416

ATOM 130 O1 M 5.321 1.050 3.046

ATOM 131 H2 M 5.582 0.143 3.027

ATOM 132 H3 M 5.329 1.316 3.952

ATOM 133 O1 M 3.534 3.089 2.318

ATOM 134 H2 M 4.242 2.470 2.390

ATOM 135 H3 M 3.395 3.237 1.396

ATOM 136 O1 M 3.483 1.114 -1.924

ATOM 137 H2 M 3.852 0.873 -1.089

ATOM 138 H3 M 3.631 0.386 -2.506

ATOM 139 O1 M 0.723 1.269 -2.363

ATOM 140 H2 M 0.731 0.439 -2.812

ATOM 141 H3 M 1.623 1.541 -2.279

ATOM 142 O1 M 2.811 3.343 -0.381

ATOM 143 H2 M 2.361 4.009 -0.875

ATOM 144 H3 M 3.160 2.729 -1.008

ATOM 145 O1 M -1.880 5.334 5.855

ATOM 146 H2 M -2.271 6.101 6.242

ATOM 147 H3 M -2.449 5.065 5.152

ATOM 148 O1 M -4.467 2.897 -2.122

ATOM 149 H2 M -3.737 2.394 -2.447

ATOM 150 H3 M -4.943 2.335 -1.531

ATOM 151 O1 M -0.160 3.579 9.298

ATOM 152 H2 M -0.556 3.284 10.102

ATOM 153 H3 M -0.752 3.343 8.602

ATOM 154 O1 M 2.602 5.979 6.145

ATOM 155 H2 M 3.009 6.731 6.545

ATOM 156 H3 M 2.474 5.343 6.831

ATOM 157 O1 M 4.387 4.342 4.703

ATOM 158 H2 M 4.103 4.171 3.819

ATOM 159 H3 M 3.774 4.960 5.069

ATOM 160 O1 M 2.276 4.191 8.163

ATOM 161 H2 M 1.457 4.094 8.622

ATOM 162 H3 M 2.647 3.327 8.084

ATOM 163 O1 M 0.443 5.873 4.408

ATOM 164 H2 M -0.262 5.682 5.005

ATOM 165 H3 M 1.219 5.984 4.933

ATOM 166 O1 M 5.488 -1.680 2.766

ATOM 167 H2 M 4.585 -1.736 3.034

ATOM 168 H3 M 5.818 -2.564 2.736

ATOM 169 O1 M -1.257 4.342 -3.208

ATOM 170 H2 M -1.614 3.492 -3.009

ATOM 171 H3 M -1.629 4.608 -4.034

ATOM 172 O1 M -1.229 6.305 -0.249

ATOM 173 H2 M -1.882 5.624 -0.275

ATOM 174 H3 M -1.466 6.935 -0.910

ATOM 175 O1 M 0.920 4.956 -1.578

ATOM 176 H2 M 0.414 5.454 -0.955

ATOM 177 H3 M 0.324 4.685 -2.257

TER

-----------------------------------------------------------------------

REMARK CH2OH+GSH (conformation A) and 44 water molecules

REMARK Configuration of the barrier

REMARK QM(RHF/6-31G**)/MM(OPLSAA;TIP3P)

REMARK Energy -551.882574 au

ATOM 5 SH Q 1.215 2.771 4.670

ATOM 6 HS Q 0.826 3.251 3.272

ATOM 7 C Q 0.296 3.626 1.986

ATOM 8 H Q 0.903 4.475 1.717

ATOM 9 H Q -0.703 3.857 2.283

ATOM 10 O Q 0.338 2.598 1.066

ATOM 11 H Q 1.171 2.619 0.615

ATOM 12 C1 M -4.490 1.454 0.872

ATOM 13 O2 M -5.287 1.340 -0.083

ATOM 14 O3 M -4.688 2.030 1.958

ATOM 15 C1 M -3.087 0.927 0.677

ATOM 16 H2 M -3.033 0.539 -0.340

ATOM 17 N1 M -2.185 2.087 0.774

ATOM 18 H2 M -1.187 1.859 0.605

ATOM 19 H3 M -2.273 2.408 1.728

ATOM 20 H4 M -2.550 2.827 0.185

ATOM 21 C1 M -2.777 -0.250 1.651

ATOM 22 H2 M -2.093 -0.969 1.208

ATOM 23 H3 M -3.734 -0.773 1.682

ATOM 24 C1 M -2.512 -0.030 3.157

ATOM 25 H2 M -3.380 0.462 3.593

ATOM 26 H3 M -2.517 -1.039 3.567

ATOM 27 C M -1.184 0.633 3.378

ATOM 28 O M -1.100 1.860 3.354

ATOM 29 N M -0.102 -0.151 3.471

ATOM 30 H M -0.227 -1.151 3.420

ATOM 31 CA M 1.228 0.303 3.118

ATOM 32 HA M 1.153 0.902 2.209

ATOM 33 CB M 1.877 1.169 4.220

ATOM 34 HB1 M 2.898 1.260 3.847

ATOM 35 HB2 M 1.901 0.553 5.121

ATOM 36 C M 2.021 -0.934 2.718

ATOM 37 O M 2.862 -1.434 3.464

ATOM 38 N M 1.738 -1.454 1.516

ATOM 39 H M 1.088 -0.964 0.921

ATOM 40 C1 M 2.242 -2.685 0.938

ATOM 41 H2 M 3.327 -2.747 0.861

ATOM 42 H3 M 1.869 -3.576 1.447

ATOM 43 C1 M 1.687 -2.804 -0.474

ATOM 44 O2 M 0.497 -2.488 -0.648

ATOM 45 O3 M 2.457 -3.157 -1.395

ATOM 46 O1 M -0.728 -2.957 3.699

ATOM 47 H2 M -1.512 -3.144 4.190

ATOM 48 H3 M -0.880 -3.259 2.818

ATOM 49 O1 M -3.540 4.787 3.659

ATOM 50 H2 M -4.280 4.732 3.075

ATOM 51 H3 M -2.917 5.368 3.253

ATOM 52 O1 M -5.069 -1.684 4.118

ATOM 53 H2 M -5.451 -0.826 4.217

ATOM 54 H3 M -5.391 -2.032 3.302

ATOM 55 O1 M -5.963 0.991 3.985

ATOM 56 H2 M -5.542 1.361 3.225

ATOM 57 H3 M -6.879 1.206 3.919

ATOM 58 O1 M -5.432 4.509 1.624

ATOM 59 H2 M -6.312 4.567 1.289

ATOM 60 H3 M -5.243 3.590 1.732

ATOM 61 O1 M -1.978 1.708 -2.685

ATOM 62 H2 M -2.187 0.849 -3.015

ATOM 63 H3 M -1.046 1.720 -2.531

ATOM 64 O1 M -1.661 6.359 2.523

ATOM 65 H2 M -0.889 6.426 3.062

ATOM 66 H3 M -1.377 6.461 1.628

ATOM 67 O1 M 4.369 0.271 0.573

ATOM 68 H2 M 4.296 -0.652 0.750

ATOM 69 H3 M 4.864 0.645 1.285

ATOM 70 O1 M -3.589 -2.858 -0.412

ATOM 71 H2 M -4.258 -2.288 -0.754

ATOM 72 H3 M -3.040 -3.100 -1.140

ATOM 73 O1 M -5.657 -2.490 1.549

ATOM 74 H2 M -6.019 -1.974 0.847

ATOM 75 H3 M -4.979 -3.026 1.169

ATOM 76 O1 M -1.321 -3.420 1.136

ATOM 77 H2 M -2.118 -3.399 0.631

ATOM 78 H3 M -0.620 -3.192 0.547

ATOM 79 O1 M 1.318 -2.746 5.482

ATOM 80 H2 M 0.689 -2.993 4.823

ATOM 81 H3 M 2.113 -2.519 5.026

ATOM 82 O1 M 2.872 1.463 7.693

ATOM 83 H2 M 3.222 0.751 8.206

ATOM 84 H3 M 1.948 1.298 7.595

ATOM 85 O1 M 4.724 1.895 5.589

ATOM 86 H2 M 4.765 2.817 5.393

ATOM 87 H3 M 4.258 1.812 6.405

ATOM 88 O1 M -0.897 -1.448 6.521

ATOM 89 H2 M -0.126 -1.957 6.328

ATOM 90 H3 M -1.635 -1.942 6.203

ATOM 91 O1 M -3.289 4.500 -0.187

ATOM 92 H2 M -3.709 4.163 -0.962

ATOM 93 H3 M -3.977 4.723 0.419

ATOM 94 O1 M -5.736 -1.098 -0.948

ATOM 95 H2 M -5.607 -0.215 -0.640

ATOM 96 H3 M -6.285 -1.041 -1.714

ATOM 97 O1 M -0.186 -0.028 -0.158

ATOM 98 H2 M -0.041 -0.923 -0.418

ATOM 99 H3 M 0.106 0.513 -0.873

ATOM 100 O1 M -3.874 2.453 5.290

ATOM 101 H2 M -3.785 3.176 4.690

ATOM 102 H3 M -4.611 1.943 4.993

ATOM 103 O1 M -1.742 2.834 7.017

ATOM 104 H2 M -1.605 3.697 6.658

ATOM 105 H3 M -2.501 2.478 6.584

ATOM 106 O1 M 0.888 -1.263 -3.234

ATOM 107 H2 M 1.778 -1.341 -3.538

ATOM 108 H3 M 0.802 -1.844 -2.495

ATOM 109 O1 M -1.500 -3.397 -2.153

ATOM 110 H2 M -1.076 -4.031 -2.709

ATOM 111 H3 M -0.836 -3.054 -1.577

ATOM 112 O1 M 0.888 -4.609 -3.127

ATOM 113 H2 M 1.305 -4.133 -2.427

ATOM 114 H3 M 1.576 -4.900 -3.704

ATOM 115 O1 M -1.863 -0.930 -3.454

ATOM 116 H2 M -2.087 -1.774 -3.094

ATOM 117 H3 M -0.941 -0.956 -3.653

ATOM 118 O1 M 0.273 0.914 7.146

ATOM 119 H2 M -0.152 0.083 7.010

ATOM 120 H3 M -0.401 1.573 7.113

ATOM 121 O1 M -2.995 -2.980 5.335

ATOM 122 H2 M -3.364 -3.667 5.866

ATOM 123 H3 M -3.721 -2.515 4.950

ATOM 124 O1 M 3.686 -1.494 -3.059

ATOM 125 H2 M 4.247 -2.064 -3.561

ATOM 126 H3 M 3.305 -2.021 -2.376

ATOM 127 O1 M 3.968 -4.526 -3.049

ATOM 128 H2 M 4.437 -5.199 -2.581

ATOM 129 H3 M 3.444 -4.068 -2.412

ATOM 130 O1 M 5.430 1.079 3.020

ATOM 131 H2 M 5.669 0.166 3.029

ATOM 132 H3 M 5.371 1.353 3.922

ATOM 133 O1 M 3.789 3.244 2.292

ATOM 134 H2 M 4.466 2.590 2.356

ATOM 135 H3 M 3.596 3.346 1.373

ATOM 136 O1 M 3.452 1.041 -1.848

ATOM 137 H2 M 3.824 0.804 -1.014

ATOM 138 H3 M 3.601 0.311 -2.428

ATOM 139 O1 M 0.720 1.302 -2.386

ATOM 140 H2 M 0.728 0.469 -2.829

ATOM 141 H3 M 1.621 1.555 -2.267

ATOM 142 O1 M 2.817 3.279 -0.304

ATOM 143 H2 M 2.346 3.928 -0.802

ATOM 144 H3 M 3.130 2.637 -0.921

ATOM 145 O1 M -1.924 5.346 5.855

ATOM 146 H2 M -2.340 6.063 6.307

ATOM 147 H3 M -2.505 5.095 5.154

ATOM 148 O1 M -4.430 2.927 -2.081

ATOM 149 H2 M -3.706 2.425 -2.422

ATOM 150 H3 M -4.899 2.359 -1.490

ATOM 151 O1 M -0.196 3.483 9.214

ATOM 152 H2 M -0.554 3.074 9.986

ATOM 153 H3 M -0.768 3.257 8.498

ATOM 154 O1 M 2.551 6.052 6.076

ATOM 155 H2 M 2.952 6.786 6.513

ATOM 156 H3 M 2.402 5.392 6.735

ATOM 157 O1 M 4.458 4.466 4.723

ATOM 158 H2 M 4.216 4.253 3.836

ATOM 159 H3 M 3.796 5.053 5.052

ATOM 160 O1 M 2.182 4.195 8.021

ATOM 161 H2 M 1.375 4.078 8.496

ATOM 162 H3 M 2.590 3.345 7.967

ATOM 163 O1 M 0.340 6.067 4.387

ATOM 164 H2 M -0.325 5.802 5.001

ATOM 165 H3 M 1.151 6.109 4.868

ATOM 166 O1 M 5.490 -1.669 2.788

ATOM 167 H2 M 4.588 -1.736 3.059

ATOM 168 H3 M 5.845 -2.543 2.808

ATOM 169 O1 M -1.228 4.361 -3.162

ATOM 170 H2 M -1.598 3.510 -2.990

ATOM 171 H3 M -1.560 4.637 -4.002

ATOM 172 O1 M -1.169 6.259 -0.229

ATOM 173 H2 M -1.857 5.614 -0.257

ATOM 174 H3 M -1.347 6.877 -0.919

ATOM 175 O1 M 0.950 4.888 -1.504

ATOM 176 H2 M 0.451 5.428 -0.913

ATOM 177 H3 M 0.361 4.620 -2.191

TER

-----------------------------------------------------------------------

REMARK CH2OH+GSH (conformation A) and 44 water molecules

REMARK Equilibrium configuration of the products

REMARK QM(RHF/6-31G**)/MM(OPLSAA;TIP3P)

REMARK Energy -551.94193 au

ATOM 5 SH Q 1.360 2.595 4.885

ATOM 6 HS Q 0.977 3.662 2.550

ATOM 7 C Q 0.233 3.713 1.779

ATOM 8 H Q 0.373 4.602 1.178

ATOM 9 H Q -0.726 3.753 2.261

ATOM 10 O Q 0.274 2.556 0.960

ATOM 11 H Q 1.100 2.551 0.501

ATOM 12 C1 M -4.501 1.437 0.973

ATOM 13 O2 M -5.276 1.315 0.000

ATOM 14 O3 M -4.720 2.027 2.047

ATOM 15 C1 M -3.091 0.915 0.810

ATOM 16 H2 M -3.035 0.465 -0.180

ATOM 17 N1 M -2.216 2.095 0.834

ATOM 18 H2 M -1.219 1.870 0.653

ATOM 19 H3 M -2.284 2.485 1.763

ATOM 20 H4 M -2.611 2.783 0.203

ATOM 21 C1 M -2.749 -0.190 1.854

ATOM 22 H2 M -2.090 -0.949 1.440

ATOM 23 H3 M -3.709 -0.697 1.959

ATOM 24 C1 M -2.426 0.148 3.326

ATOM 25 H2 M -3.256 0.721 3.737

ATOM 26 H3 M -2.475 -0.823 3.816

ATOM 27 C M -1.041 0.721 3.500

ATOM 28 O M -0.869 1.915 3.737

ATOM 29 N M -0.015 -0.122 3.321

ATOM 30 H M -0.217 -1.076 3.064

ATOM 31 CA M 1.355 0.297 3.122

ATOM 32 HA M 1.385 0.995 2.284

ATOM 33 CB M 1.911 0.970 4.404

ATOM 34 HB1 M 2.975 1.049 4.176

ATOM 35 HB2 M 1.790 0.234 5.200

ATOM 36 C M 2.118 -0.947 2.678

ATOM 37 O M 2.958 -1.476 3.404

ATOM 38 N M 1.812 -1.439 1.469

ATOM 39 H M 1.164 -0.926 0.892

ATOM 40 C1 M 2.298 -2.673 0.877

ATOM 41 H2 M 3.383 -2.740 0.798

ATOM 42 H3 M 1.922 -3.560 1.390

ATOM 43 C1 M 1.743 -2.795 -0.534

ATOM 44 O2 M 0.546 -2.506 -0.707

ATOM 45 O3 M 2.520 -3.127 -1.457

ATOM 46 O1 M -0.781 -2.911 3.619

ATOM 47 H2 M -1.559 -3.121 4.111

ATOM 48 H3 M -0.921 -3.226 2.741

ATOM 49 O1 M -3.504 4.791 3.615

ATOM 50 H2 M -4.257 4.736 3.048

ATOM 51 H3 M -2.898 5.387 3.204

ATOM 52 O1 M -5.042 -1.631 4.125

ATOM 53 H2 M -5.436 -0.781 4.247

ATOM 54 H3 M -5.356 -1.959 3.298

ATOM 55 O1 M -5.962 1.025 4.102

ATOM 56 H2 M -5.553 1.384 3.330

ATOM 57 H3 M -6.881 1.229 4.041

ATOM 58 O1 M -5.466 4.500 1.653

ATOM 59 H2 M -6.352 4.559 1.333

ATOM 60 H3 M -5.282 3.582 1.773

ATOM 61 O1 M -1.982 1.695 -2.574

ATOM 62 H2 M -2.177 0.850 -2.947

ATOM 63 H3 M -1.057 1.701 -2.386

ATOM 64 O1 M -1.675 6.419 2.465

ATOM 65 H2 M -0.889 6.487 2.983

ATOM 66 H3 M -1.415 6.515 1.563

ATOM 67 O1 M 4.496 0.242 0.574

ATOM 68 H2 M 4.363 -0.679 0.722

ATOM 69 H3 M 4.982 0.569 1.314

ATOM 70 O1 M -3.557 -2.823 -0.449

ATOM 71 H2 M -4.226 -2.247 -0.782

ATOM 72 H3 M -3.017 -3.065 -1.184

ATOM 73 O1 M -5.585 -2.422 1.541

ATOM 74 H2 M -5.968 -1.920 0.839

ATOM 75 H3 M -4.905 -2.951 1.155

ATOM 76 O1 M -1.293 -3.410 1.060

ATOM 77 H2 M -2.091 -3.351 0.559

ATOM 78 H3 M -0.588 -3.193 0.472

ATOM 79 O1 M 1.257 -2.660 5.399

ATOM 80 H2 M 0.625 -2.891 4.737

ATOM 81 H3 M 2.087 -2.561 4.959

ATOM 82 O1 M 2.836 1.409 7.876

ATOM 83 H2 M 3.164 0.711 8.422

ATOM 84 H3 M 1.912 1.256 7.767

ATOM 85 O1 M 4.736 1.790 5.775

ATOM 86 H2 M 4.752 2.707 5.551

ATOM 87 H3 M 4.300 1.722 6.609

ATOM 88 O1 M -0.981 -1.445 6.466

ATOM 89 H2 M -0.196 -1.924 6.254

ATOM 90 H3 M -1.706 -1.961 6.152

ATOM 91 O1 M -3.345 4.481 -0.184

ATOM 92 H2 M -3.770 4.130 -0.950

ATOM 93 H3 M -4.030 4.717 0.421

ATOM 94 O1 M -5.705 -1.075 -0.979

ATOM 95 H2 M -5.580 -0.206 -0.631

ATOM 96 H3 M -6.240 -0.984 -1.751

ATOM 97 O1 M -0.254 -0.123 -0.084

ATOM 98 H2 M -0.073 -0.999 -0.385

ATOM 99 H3 M 0.041 0.463 -0.762

ATOM 100 O1 M -3.934 2.581 5.390

ATOM 101 H2 M -3.844 3.276 4.757

ATOM 102 H3 M -4.655 2.044 5.103

ATOM 103 O1 M -1.682 2.812 6.991

ATOM 104 H2 M -1.532 3.669 6.623

ATOM 105 H3 M -2.482 2.489 6.609

ATOM 106 O1 M 0.901 -1.235 -3.265

ATOM 107 H2 M 1.790 -1.298 -3.576

ATOM 108 H3 M 0.828 -1.824 -2.531

ATOM 109 O1 M -1.475 -3.386 -2.206

ATOM 110 H2 M -1.062 -4.022 -2.767

ATOM 111 H3 M -0.803 -3.053 -1.632

ATOM 112 O1 M 0.928 -4.593 -3.178

ATOM 113 H2 M 1.335 -4.112 -2.475

ATOM 114 H3 M 1.623 -4.869 -3.755

ATOM 115 O1 M -1.850 -0.902 -3.472

ATOM 116 H2 M -2.065 -1.752 -3.122

ATOM 117 H3 M -0.929 -0.918 -3.676

ATOM 118 O1 M 0.211 0.795 7.408

ATOM 119 H2 M -0.235 -0.009 7.202

ATOM 120 H3 M -0.420 1.489 7.307

ATOM 121 O1 M -3.018 -3.021 5.284

ATOM 122 H2 M -3.398 -3.734 5.772

ATOM 123 H3 M -3.735 -2.530 4.917

ATOM 124 O1 M 3.709 -1.441 -3.115

ATOM 125 H2 M 4.266 -1.997 -3.635

ATOM 126 H3 M 3.338 -1.985 -2.438

ATOM 127 O1 M 3.996 -4.493 -3.143

ATOM 128 H2 M 4.473 -5.165 -2.682

ATOM 129 H3 M 3.484 -4.034 -2.497

ATOM 130 O1 M 5.436 0.979 3.133

ATOM 131 H2 M 5.690 0.070 3.124

ATOM 132 H3 M 5.421 1.247 4.038

ATOM 133 O1 M 3.706 3.054 2.363

ATOM 134 H2 M 4.410 2.426 2.392

ATOM 135 H3 M 3.513 3.203 1.451

ATOM 136 O1 M 3.478 1.046 -1.813

ATOM 137 H2 M 3.886 0.805 -0.996

ATOM 138 H3 M 3.621 0.329 -2.409

ATOM 139 O1 M 0.716 1.269 -2.258

ATOM 140 H2 M 0.726 0.458 -2.740

ATOM 141 H3 M 1.616 1.530 -2.147

ATOM 142 O1 M 2.849 3.294 -0.288

ATOM 143 H2 M 2.386 3.950 -0.784

ATOM 144 H3 M 3.176 2.664 -0.911

ATOM 145 O1 M -1.868 5.307 5.805

ATOM 146 H2 M -2.299 5.991 6.293

ATOM 147 H3 M -2.446 5.074 5.096

ATOM 148 O1 M -4.475 2.858 -2.042

ATOM 149 H2 M -3.729 2.373 -2.356

ATOM 150 H3 M -4.922 2.300 -1.425

ATOM 151 O1 M -0.215 3.576 9.214

ATOM 152 H2 M -0.567 3.165 9.987

ATOM 153 H3 M -0.764 3.313 8.493

ATOM 154 O1 M 2.506 6.042 6.107

ATOM 155 H2 M 2.893 6.804 6.509

ATOM 156 H3 M 2.385 5.405 6.794

ATOM 157 O1 M 4.266 4.274 4.814

ATOM 158 H2 M 4.087 4.116 3.901

ATOM 159 H3 M 3.696 4.976 5.085

ATOM 160 O1 M 2.215 4.196 8.080

ATOM 161 H2 M 1.388 4.117 8.528

ATOM 162 H3 M 2.597 3.333 8.063

ATOM 163 O1 M 0.344 6.147 4.346

ATOM 164 H2 M -0.331 5.836 4.927

ATOM 165 H3 M 1.143 6.168 4.847

ATOM 166 O1 M 5.601 -1.749 2.831

ATOM 167 H2 M 4.687 -1.821 3.055

ATOM 168 H3 M 5.944 -2.628 2.804

ATOM 169 O1 M -1.247 4.338 -3.143

ATOM 170 H2 M -1.600 3.491 -2.924

ATOM 171 H3 M -1.579 4.557 -3.999

ATOM 172 O1 M -1.246 6.277 -0.335

ATOM 173 H2 M -1.915 5.611 -0.306

ATOM 174 H3 M -1.394 6.775 -1.124

ATOM 175 O1 M 1.000 4.918 -1.578

ATOM 176 H2 M 0.513 5.468 -0.985

ATOM 177 H3 M 0.390 4.620 -2.234

TER

-----------------------------------------------------------------------
